# Supplementary material for: Cyclododecanone as a recyclable protecting group for the synthesis of highly functionalized 3-amino-2-thiohydantoins from conventional starting materials
Source: Royal Society of Chemistry journal article supplement (doi:10.1039/c3ra47680d), 2014-01-01

## Supporting information for

### Cyclododecanone as a recyclable protecting group for the synthesis of highly functionalized 3-amino-2-thiohydantoins from conventional starting materials

Munusamy Sathishkumar, Gunasekar Ramachandran, and Kulathu Iyer Sathiyarayanan\*

Chemistry Division, School of Advanced Sciences, VIT University, Vellore-632014, Tamilnadu, India.

---

#### Table of Contents

|                                                                                        |      |
|----------------------------------------------------------------------------------------|------|
| General Experimental procedure                                                         | 1    |
| Spectral data of compounds (5) and derivatives (7a-7n)                                 | 1-3  |
| <sup>1</sup> H and <sup>13</sup> C NMR spectra for the compound (5)                    | 4-5  |
| <sup>1</sup> H spectra for the compound (6)                                            | 6    |
| <sup>1</sup> H and <sup>13</sup> C NMR spectra for 2-thiohydantoin derivatives (7a-7n) | 7-20 |

---

#### General Experimental procedure:

**Analytical methods:** Chemicals were purchased from Aldrich and they were used without further purification. TLC -Thin layer chromatography (Merck, Silica gel 60 F254) was performed on pre-coated silica gel on alumina plates. IR spectra were recorded in the range 4000-400cm<sup>-1</sup> on Thermo Nicolet Avatar 330 FTIR spectrometer in KBr pellets. <sup>1</sup>H NMR and <sup>13</sup>C NMR spectra were recorded using a Bruker AMX 400 FT. HRMS analysis was obtained from JEOL GC Mate.

#### Synthesis of 2-cyclododecylidenehydrazine carbothiamide from CDD:

In an oven dried three necked RB flask mixture of CDD (2mmol) and thiosemicarbazide (2mmol) were taken and dissolved in ethanol (5ml). To this 0.2ml of acetic acid was added and refluxed for about 30 min in waterbath. The completion of the reaction was monitored from TLC and the formed precipitate was filtered, washed with water and dried.

**2-cyclododecylidenehydrazine carbothiamide:** White color solid (0.4853g, 95%) Mp 190-192°C; <sup>1</sup>H-NMR (400MHz, DMSO) δ (ppm) 10.090 (s, 1H), 8.057 (s, 1H), 7.375 (s, 1H), 3.178 (d, J=5.2, 1H), 2.424-2.392 (t, J=6.4, 1H), 2.292-2.260 (t, J=6.4, 2H), 1.666 (s, 2H), 1.549-1.498 (q, J=7.2, 2H), 1.480-1.277 (m, 14H); <sup>13</sup>CNMR (100MHz, DMSO) δ (ppm) 178.3, 155.4, 31.1, 27.8, 25.2, 23.6, 23.3, 22.8, 22.4, 21.7; IR (KBr) ν (cm<sup>-1</sup>) 3406, 3226, 3145, 2933, 2902, 2852, 1595, 1500, 1462, 1290, 1240, 1070, 1055, 719; HRMS calcd for C<sub>13</sub>H<sub>25</sub>N<sub>3</sub>S (M<sup>+</sup>) 255.1769, found 255.1767.

**Synthesis 2-((E)-5-(2-fluorobenzylidene)-3-((E)-2-fluorobenzylideneamino)-4-oxo-2-thioxoimidazolidine-1-yl) acetic acid: Pale yellow color solid.**

With 5ml of acetic acid 2mmol of (6) and 4mmol of chloroacetic acid were taken in a oven dried three necked RB flask and refluxed for about 1hr. The disappearance of (6) was monitored from TLC, when (6) had completely reacted 4mmol of 2-fluorobenzaldehyde was added and refluxed further for about 2 hrs. After the completion of the reaction, the reaction mass was poured in ice cooled water and the formed yellow precipitate was filtered, dried and washed with n-hexane. The obtained filtrate was dried in vacuum and the recovered CDD can be used for further reactions for a number of times.

**2-((E) - 5-(2-fluorobenzylidene)-3-((E)-2-fluorobenzylideneamino)-4-oxo-2-thioxoimidazolidine-1-yl)acetic acid: 7a (Table-2,Entry 1)** Pale yellow color amorphous solid (0.7918g, 94%) Mp 220-223°C; <sup>1</sup>H NMR (400 MHz, DMSO) δ (ppm) 12.08(s,1H), 8.51(s,2H), 7.93-7.89(t, J=8Hz,2H), 7.55-7.50(q, J=8Hz,2H), 7.33-7.29(t, J=8Hz,4H), 3.92 (s,2H); <sup>13</sup>C NMR(100MHz,DMSO) δ (ppm) 174.2, 162.0, 159.5, 148.9, 132.7, 132.6, 127.7, 127.6, 124.0, 121.6, 121.5, 116.2, 116.0, 33.0; IR (KBr) ν (cm<sup>-1</sup>) 3572, 3192, 2949, 2762, 1732, 1649,1330,1247;HRMS calcd for C<sub>19</sub>H<sub>13</sub>F<sub>2</sub>N<sub>3</sub>O<sub>3</sub>S (M<sup>+</sup>) 401.0646, found 401.0649.

**2-((E)-5-(2-chlorobenzylidene)-3-((E)-2-chlorobenzylideneamino)-4-oxo-2-thioxoimidazolidine-1-yl)acetic acid: 7b (Table-2,Entry 2)** Pale yellow color amorphous solid (0.8359g,92%) Mp 213-215°C; <sup>1</sup>H NMR (400 MHz, DMSO) δ (ppm) 12.212 (s,1H), 8.061(s,1H), 7.992-7.968(d, J=12,2H), 7.751-7.732(d, J=7.6,1H), 7.651-7.632 (d, J=7.6,1H) 7.562-7.539(d, J=9.2,2H), 7.508-7.397(m,3H), 3.896(s,2H) <sup>13</sup>C NMR (100 MHz,DMSO) δ (ppm) 174.0, 167.0, 151.8, 130.8, 130.2, 130.0, 128.9,128.0,127.6,127.5,33.1.; IR (KBr) ν (cm<sup>-1</sup>) 3400, 2976, 2935, 2767, 1718, 1653, 1508, 1303, 1244; HRMS calcd for C<sub>19</sub>H<sub>13</sub>Cl<sub>2</sub>N<sub>3</sub>O<sub>3</sub>S (M+) 433.0055,found 433.0061

**2-((E) - 5-(3-hydroxybenzylidene)-3-((E)-3-hydroxybenzylideneamino)-4-oxo-2-thioxoimidazolidine-1-yl)acetic acid:7c (Table-2,Entry 3)** Pale yellow color amorphous solid(0.7596g,91%) Mp 283-285°C;<sup>1</sup>H NMR (400 MHz, DMSO) δ (ppm) 11.98(s,1H), 9.67(s,2H), 8.31(s,2H),7.28-7.24(t, J=8Hz,2H) 7.21(s, 2H), 7.16-7.14(d, J=8Hz,2H), 6.86-6.84(d, J=8Hz,2H), 3.854(s,2H); <sup>13</sup>CNMR (100MHz,DMSO) δ (ppm) 157.5, 156.3, 135.4, 129.8, 119.3, 117.9, 113.2, 33.0; IR (KBr) ν (cm<sup>-1</sup>) 3415,3045,2941,2752,1710,1649,1327,1247.;HRMS calcd for C<sub>19</sub>H<sub>15</sub>N<sub>3</sub>O<sub>5</sub>S (M+) 397. 0732,found 397.0738.

**2-((E)-5-(3-nitrobenzylidene)-3-((E)-3-nitrobenzylideneamino)-4-oxo-2-thioxoimidazolidine-1-yl)acetic acid: 7d (Table-2,Entry 4)** Pale yellow color amorphous solid(0.9033g,95%) Mp 254-257°C;<sup>1</sup>H NMR (400 MHz, DMSO) δ (ppm) 12.23 (s,1H), 8.58(s,4H), 8.31-8.29(t,J=4.0,2H), 8.21-8.194(d,J=4.0,2H), 7.79-7.75(t,J=8Hz,2H), 3.93(s,2H); <sup>13</sup>C NMR(100MHz,DMSO) δ (ppm) 174.0,166.9,154.2,148.1,135.9,135.4,135.3,133.3,130.8, 130.7,130.3,125.2, 124.7, 123.9, 122.4, 121.8, 33.0; IR (KBr) ν (cm<sup>-1</sup>) 3410,3043,2939,2765,1963,1940,1716,1633,1170.9; HRMS calcd for C<sub>19</sub>H<sub>13</sub>N<sub>5</sub>O<sub>7</sub>S (M+) 455.0536,found 455.0540.

**2-((E)-5-(3,4-dihydroxybenzylidene)-3-((E)-3,4-dihydroxybenzylideneamino)-4-oxo-2-thioxoimidazolidine-1-yl)acetic acid: 7e (Table-2,Entry 5)** Pale yellow color amorphous solid (0.8448g,94%)Mp 275-278°C.; <sup>1</sup>H NMR (400 MHz, DMSO) δ (ppm) 11.86(s,1H), 9.51(s,2H), 9.29(s,2H), 8.19(s,2H), 7.24(s,2H), 7.01-6.98(q, J=4,2H), 6.79-6.77(d, J=8Hz,2H), 3.87(s,2H); <sup>13</sup>CNMR (100MHz,DMSO) δ (ppm) 156.4, 148.5, 145.5, 125.6, 121.3, 115.4, 113.1, 32.9 IR(KBr) ν (cm<sup>-1</sup>) 3466,3153,2765,1683,1589,1282.; HRMS calcd for C<sub>19</sub>H<sub>15</sub>N<sub>3</sub>O<sub>7</sub>S (M+) 429.0631,found 429.0631

**2-((E) - 5-(4-methoxybenzylidene)-3-((E)-4-methoxybenzylideneamino)-4-oxo-2-thioxoimidazolidine-1-yl)acetic acid :7f (Table-2,Entry 6)** Pale yellow color amorphous solid(0.7388g,83%) Mp 210-212°C.;<sup>1</sup>H NMR (400 MHz, DMSO) δ (ppm)11.92(s,1H), 8.34(s,2H), 7.72-7.69(d, J=12,4H), 7.03-7.01(d, J=12,4H), 3.88(s,2H), 3.81(s,6H); <sup>13</sup>CNMR (100MHz,DMSO) δ (ppm) 174.4,161.8,156.3,129.8,127.3,114.8,55.8,33.4.; IR(KBr) ν (cm<sup>-1</sup>)3454, 3010, 2941, 2763, 1724, 1631,1327,1249.; HRMS calcd for C<sub>21</sub>H<sub>19</sub>N<sub>3</sub>O<sub>5</sub>S (M+) 425.1045, found 425.1049.

**2-((E)-5-(4-ethylbenzylidene)-3-((E)-4-ethylbenzylideneamino)-4-oxo-2-thioxoimidazolidine-1-yl)acetic acid: 7g (Table-2,Entry 7)** Pale yellow color amorphous solid(0.7585g,86%); Mp 231-232°C; <sup>1</sup>H NMR (400 MHz, DMSO) δ (ppm)12.0(s,1H), 8.37(s,2H), 7.68-7.66(d, J=8,4H), 7.31-7.29(d, J=8,4H), 3.844(s,2H), 2.67-2.61(q, J=8Hz,4H), 1.21-1.17(d, J=8,6H); <sup>13</sup>CNMR (100MHz,DMSO) δ (ppm) 174.4, 156.1, 146.7, 131.7, 128.2, 127.7, 32.9, 28.1, 15.3; IR (KBr) ν (cm<sup>-1</sup>) 3419, 3180, 3024, 2960, 2752, 1712, 1593, 1330, 1209; HRMS calcd for C<sub>23</sub>H<sub>23</sub>N<sub>3</sub>O<sub>3</sub>S (M+) 421.1460, found 421.1463.

**2-((E)-5-(4-fluorobenzylidene)-3-((E)-4-fluorobenzylideneamino)-4-oxo-2-thioxoimidazolidine-1-yl)acetic acid: 7h (Table-2,Entry 8)** Pale yellow color amorphous solid (0.7754g,92%); Mp 246-249°C; <sup>1</sup>H NMR (400 MHz, DMSO) δ(ppm) 11.997(s,1H), 8.418(s,1H), 7.840-7.804(q,J=5.6,4H), 7.335-7.291(t,J=8.8,5H), 3.906(s,2H) <sup>13</sup>CNMR (100MHz,DMSO) δ (ppm)174.0,165.2,164.6,162.1,155.0, 132.2,130.8,130.7,130.1, 129.8,129.7,116.1, 116.0, 115.8, 32.9; IR (KBr) ν (cm<sup>-1</sup>) 3320,2958,2760,1714,1647, 12285; HRMS calcd for C<sub>19</sub>H<sub>13</sub>F<sub>2</sub>N<sub>3</sub>O<sub>3</sub>S (M+) 401.0646,found 401.0641

**2-((E) - 5-(4-ethoxybenzylidene)-3-((E)-4-ethoxybenzylideneamino)-4-oxo-2-thioxoimidazolidine-1-yl)acetic acid: 7i (Table-2,Entry 9)** Pale yellow color amorphous solid (0.7576g ,80%); Mp 240-243°C;<sup>1</sup>H NMR (400 MHz, DMSO) δ (ppm) 11.920(s,1H),9.025(s,1H), 7.692-7.602 (q, J=8.8,4H), 7.012-6.975(t, J=8.0,5H), 4.110-4.067 (q, J=3.2,4H), 3.879(s,2H) 1.376-1.360(t, J=6.4,6H); <sup>13</sup>CNMR(100MHz,DMSO)δ(ppm) 174.0, 171.9, 160.5, 155.8, 130.1, 129.2, 126.6, 114.6, 63.2, 32.9,21.0,14.5; IR(KBr) ν (cm<sup>-1</sup>) 3390,2976,2935,2767,1718,1631,1244; HRMS calcd for C<sub>23</sub>H<sub>23</sub>N<sub>3</sub>O<sub>5</sub>S (M+) 453.1358,found 453.1351.

**2-((E)-5-(4-methylbenzylidene)-3-((E)-4-methylbenzylideneamino)-4-oxo-2-thioxoimidazolidine-1-yl)acetic acid: 7j (Table-2,Entry 10 )** Pale yellow color amorphous solid(0.7029g,85%); Mp 221-223°C; <sup>1</sup>H NMR (400 MHz, DMSO) δ (ppm) 11.954(s,1H),8.361(s,1H),7.659-7.639(d, J=8.0,4H), 7.574-7.554(d, J=8Hz,1H),7.283-7.263(d, J=8.0,4H),3.889(s,2H), 2.363-2.347(t, J=5.2,6H) <sup>13</sup>CNMR(100MHz,DMSO) δ (ppm) 184.1,156.1,140.5,131.4,129.8,129.3,127.9,127.6,32.9,21.0; IR

(KBr)  $\nu$  ( $\text{cm}^{-1}$ ) 3390,2953,2762,1708,1649,1205; HRMS calcd for  $\text{C}_{21}\text{H}_{19}\text{N}_3\text{O}_3\text{S}$  ( $\text{M}^+$ ) 393.1147,found 393.1142.

**2-((E)-5-(4-bromobenzylidene)-3-((E)-4-bromobenzylideneamino)-4-oxo-2-thioxoimidazolidine-1-yl)acetic acid: 7k (Table-2,Entry 11)** Pale yellow color amorphous solid(0.9669g,89%); Mp 217-220°C;  $^1\text{H}$  NMR (400 MHz, DMSO)  $\delta$  (ppm)12.145(s,1H),8.595(s,1H),7.974-7.950(d,J=9.6,2H),7.725-7.702(d,J=9.2,1H),7.487(s,1H), 7.458(s,1H), 7.428-7.424(d, J=1.6Hz, 1H)7.442-7.438 (d, J=5.6, 1H), 7.404-7.390 (d, J=5.6,2H) 3.934(s,2H);  $^{13}\text{C}$ NMR (100MHz,DMSO)  $\delta$  (ppm) 174.2, 173.2, 171.9, 167.0, 158.6, 155.9,154.2,133.5,133.3,132.7,131.4,129.1,128.5,127.8,126.4,125,124.1,123.8,33.1IR(KBr)  $\nu$  ( $\text{cm}^{-1}$ ) 3390, 2993, 2773, 11720,1637,1232; HRMS calcd for  $\text{C}_{19}\text{H}_{13}\text{Br}_2\text{N}_3\text{O}_3\text{S}$  ( $\text{M}^+$ ) 520.9044,found 520.9036.

**2-((E)-5-(4-hydroxybenzylidene)-3-((E)-4-hydroxybenzylideneamino)-4-oxo-2-thioxoimidazolidine-1-yl)acetic acid: 7l (Table-2,Entry 12)** Pale yellow color amorphous solid (0.7597g,91%); Mp 292-295°C;  $^1\text{H}$  NMR (400 MHz, DMSO)  $\delta$  (ppm) 11.88 (s, 1H), 10.02(s, 2H), 8.28(s, 2H), 7.60-7.58(d, J=8, 4H), 6.85-6.83(d, J=8, 4H), 3.87(s, 2H);  $^{13}\text{C}$  NMR (100MHz, DMSO)  $\delta$  (ppm) 173.2, 159.8, 158.6, 156.0, 129.4, 125.1, 115.6, 78.9, 33.021; IR(KBr)  $\nu$  ( $\text{cm}^{-1}$ )3496, 3223, 2929, 2850, 1705, 1639,1242; HRMS calcd for  $\text{C}_{19}\text{H}_{15}\text{N}_3\text{O}_5\text{S}$  ( $\text{M}^+$ ) 397.0732,found 397.0735.

**2-((E)-5-(4-benzyloxybenzylidene)-3-((E)-4-benzyloxybenzylideneamino)-4-oxo-2-thioxoimidazolidine-1-yl)acetic acid: 7m (Table-2, Entry13)** Pale yellow color amorphous solid(1.0510g,88%) Mp 263-266°C;  $^1\text{H}$  NMR (400 MHz, DMSO)  $\delta$  (ppm) 11.900(s,1H), 9.045(s,1H), 7.7167.694(d, J=8.8,4H), 7.4757.457(q, J=7.2,5H), 7.4167.411(t, J=2,4H), 7.334-7.323(d, J=4.4,2H), 7.167-7.114(t, J=9.2,4H), 5.230(s,2H), 4.052(t, J=2,2H), 3.880(s,2H);  $^{13}\text{C}$  NMR (100MHz, DMSO)  $\delta$  (ppm) 174.0,163.8,160.3,155.7,136.6,130.1,129.2128.4,127.8,127.7,126.9,115.3,1,69.3,32.8 IR (KBr)  $\nu$  ( $\text{cm}^{-1}$ ) 3490, 2958, 2937, 2765,1714,1639,1244; HRMS calcd for  $\text{C}_{33}\text{H}_{27}\text{N}_3\text{O}_5\text{S}$  ( $\text{M}^+$ ) 577.1671,found 577.1677.

**2-((E)-4-oxo-5-((E)-3-phenylallydene)-3-((E)-((E)-3-phenylallydene)amino)-2-thioxoimidazolidine-1-yl)acetic acid : 7n (Table-2,Entry14)** Pale yellow color amorphous solid(0.6912g,79%) Mp 227-230°C;  $^1\text{H}$  NMR (400 MHz, DMSO)  $\delta$  (ppm) 12.092(s,1H),8.004(s,1H), 8.023-7.989(t, J=7.6,2H), 7.724-7.686(m,1H),7.662(s,1H), 7.602-7.501(m,4H), 7.460-7.414(q, J=7.6,1H),7.387-7.309(m,6H),3.919(s,2H);  $^{13}\text{C}$ NMR(100MHz,DMSO)  $\delta$  (ppm) 174.1,162.0,159.5, 150.6,148.9, 132.6, 132.5,132.0,128.8,127.5,127.1,125.3,124.8,121.6,121.5,119.9,116.2,116.0,33.0; IR (KBr)  $\nu$  ( $\text{cm}^{-1}$ ) 3352, 3217, 3140, 3060, 2931,2860,2737,1707,1638,1238; HRMS calcd for  $\text{C}_{23}\text{H}_{19}\text{O}_3\text{N}_3\text{O}_3\text{S}$  ( $\text{M}^+$ ) 417.1147, found 417.1148.

### 2-cyclododecylidenehydrazine carbothiamide:

<sup>1</sup>H NMR, DMSO, 400 MHz

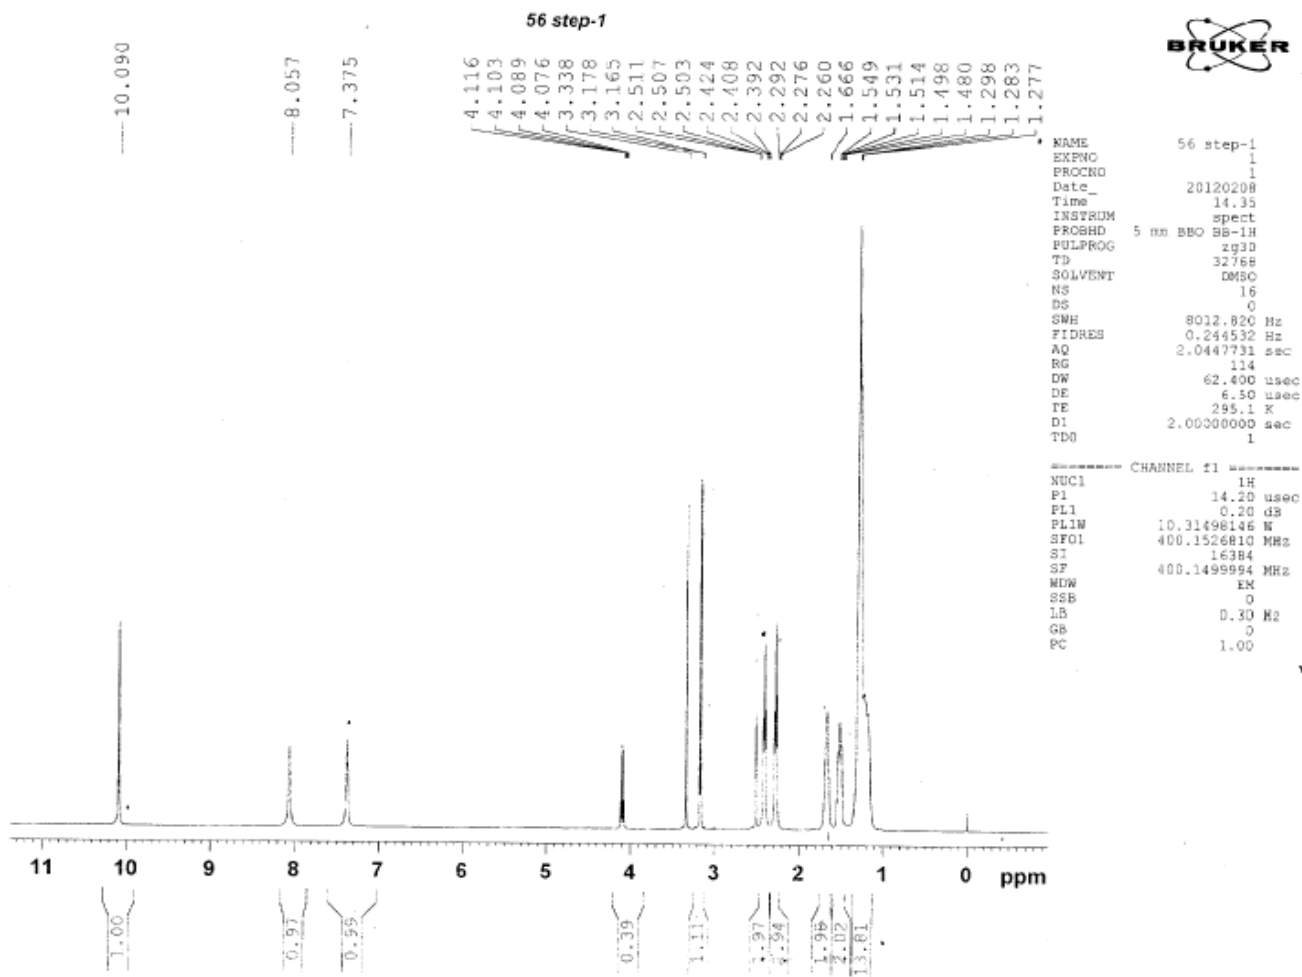

<sup>13</sup>C NMR, DMSO, 400 MHz

56 C13

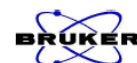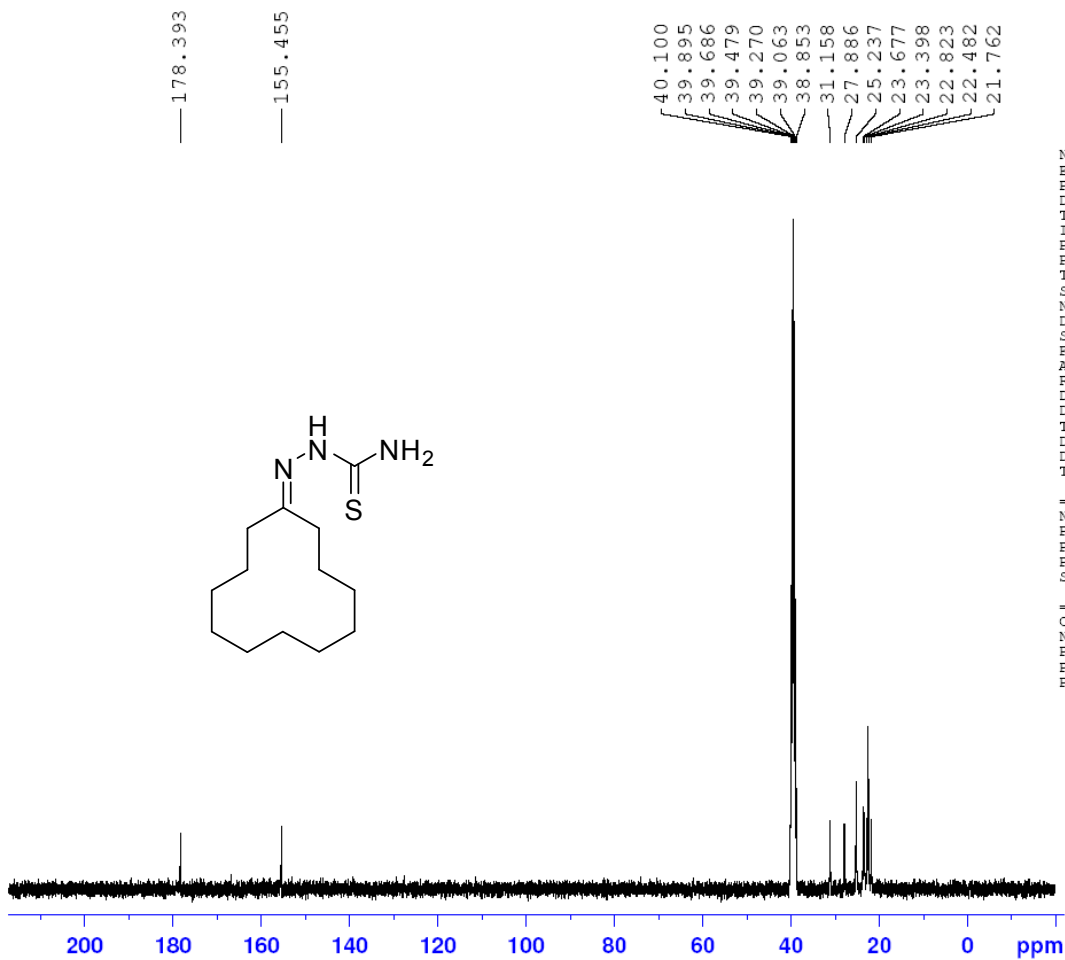

```
NAME          56 C13
EXPNO         1
PROCNO        1
Date_         20120216
Time          16.56
INSTRUM       spect
PROBHD        5 mm BBO BB-1H
PULPROG       zgpg30
TD            65536
SOLVENT       DMSO
NS            463
DS            4
SWH           24038.461 Hz
FIDRES        0.366798 Hz
AQ            1.3631988 sec
RG            2050
DW            20.800 usec
DE            6.50 usec
TE            296.9 K
D1            2.0000000 sec
D11           0.0300000 sec
TD0           1
```

```
===== CHANNEL f1 =====
NUC1           13C
P1             9.89 usec
PL1            -0.80 dB
PL1W           44.09129333 W
SFO1           100.6278593 MHz

===== CHANNEL f2 =====
CPDPRG2       waltz16
NUC2           1H
PCPD2          90.00 usec
PL2            0.20 dB
PL12           16.20 dB
```

<sup>1</sup>H NMR of 3-amino-2-thioximidazolidin-4-one (6)

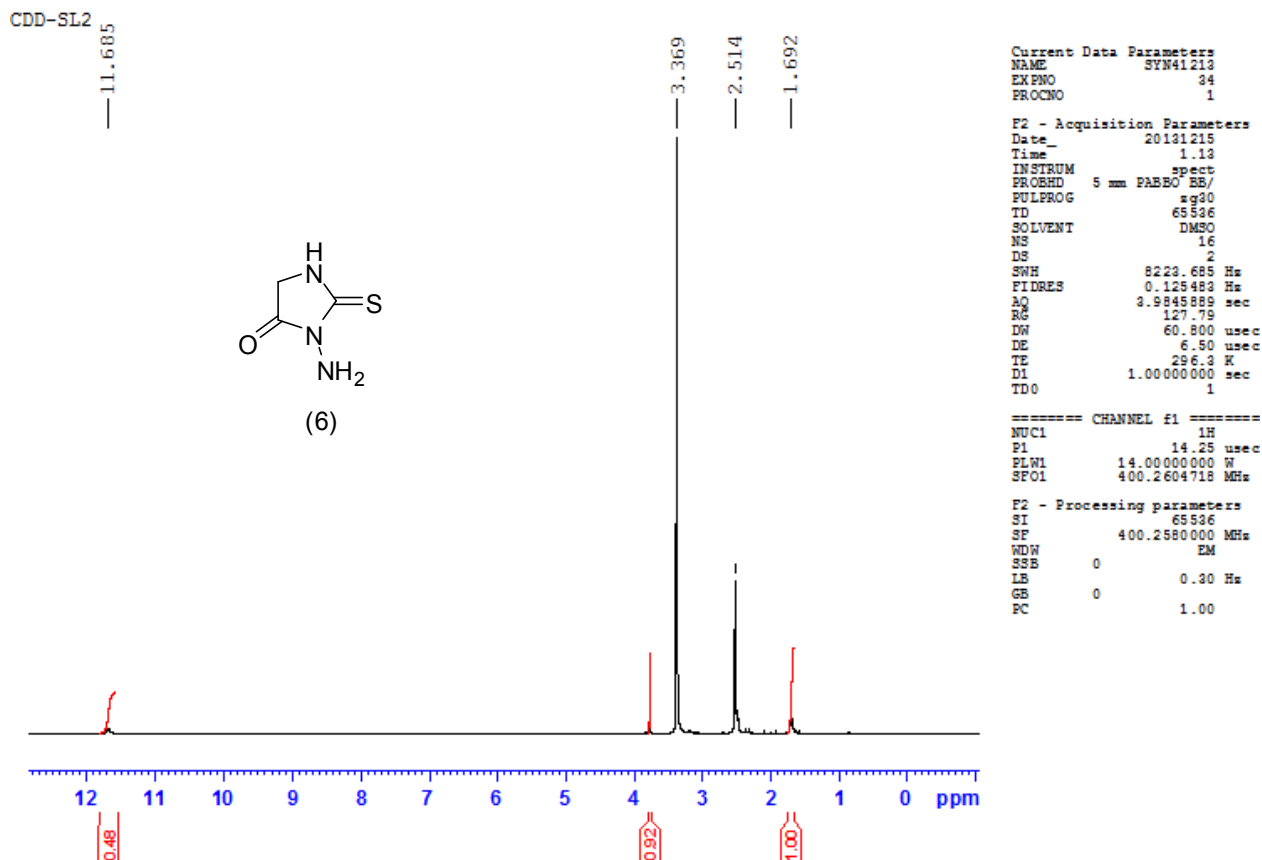

2-((E)-5-(2-fluorobenzylidene)-3-((E)-2-fluorobenzylideneamino)-4-oxo-2-thioxoimidazolidine-1-yl)acetic acid (7a)

<sup>1</sup>H NMR, DMSO, 400 MHz

CDD-2F

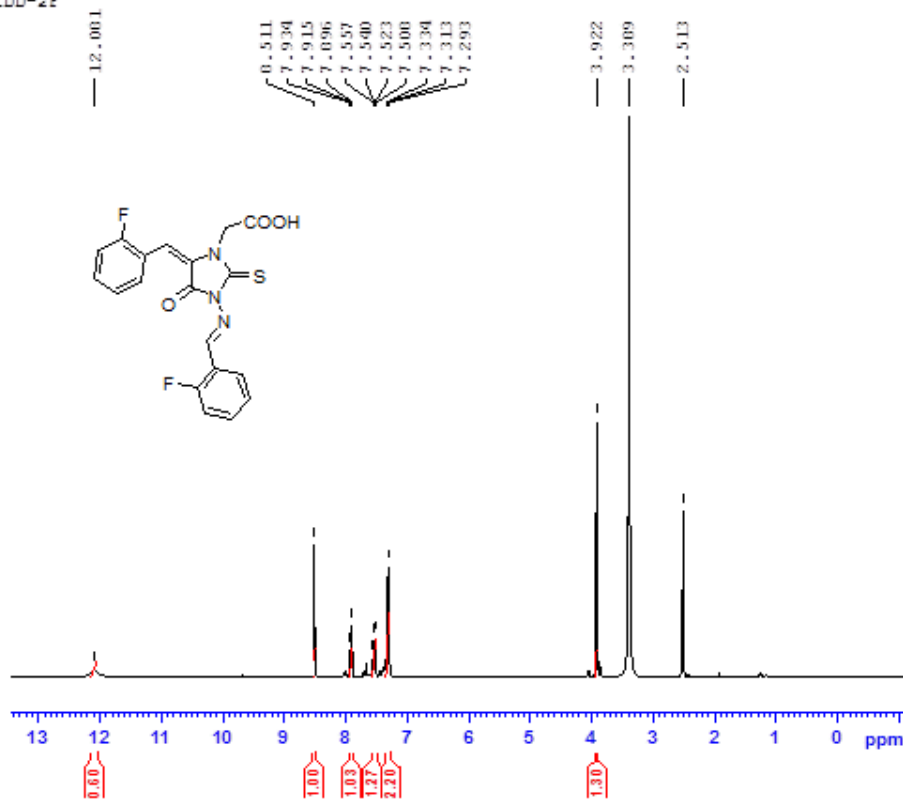

Current Data Parameters  
 NAME: 57341213  
 EXPNO: 10  
 PROCNO: 1

F2 - Acquisition Parameters  
 Date\_: 20131201  
 Time: 9.48  
 INSTRUM: spect  
 PROBRD: 5 mm PABBO BB/  
 PULPROG: zgpg30  
 TD: 65536  
 SOLVENT: DMSO  
 NS: 16  
 DS: 2  
 SWH: 8223.658 Hz  
 FIDRES: 0.128483 Hz  
 AQ: 3.0545559 sec  
 RG: 35.55  
 DM: 50.500 usec  
 DE: 8.50 usec  
 TE: 295.4 K  
 D1: 1.00000000 sec  
 TDO: 1

===== CHANNEL f1 =====  
 NUCL1: 1H  
 P1: 14.25 usec  
 PL1: 14.00000000 W  
 SFO1: 400.1464718 MHz

F2 - Processing parameters  
 SI: 65536  
 SF: 400.1464718 MHz  
 WDW: EM  
 SSB: 0  
 LB: 0.30 Hz  
 GB: 0  
 PC: 1.00

<sup>13</sup>C NMR, DMSO, 400 MHz

CDD-2F

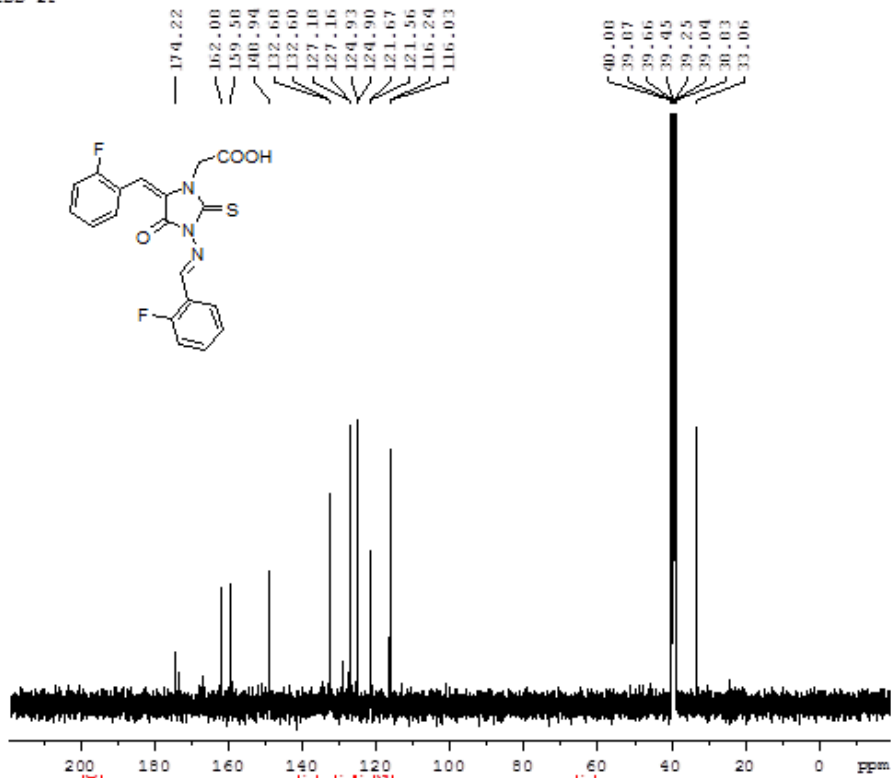

Current Data Parameters  
 NAME: 57341213  
 EXPNO: 16  
 PROCNO: 1

F2 - Acquisition Parameters  
 Date\_: 20131201  
 Time: 15.14  
 INSTRUM: spect  
 PROBRD: 5 mm PABBO BB/  
 PULPROG: zgpg30  
 TD: 65536  
 SOLVENT: DMSO  
 NS: 1024  
 DS: 4  
 SWH: 24035.461 Hz  
 FIDRES: 0.366795 Hz  
 AQ: 1.3631488 sec  
 RG: 71.15  
 DM: 20.500 usec  
 DE: 8.50 usec  
 TE: 295.9 K  
 D1: 2.00000000 sec  
 D11: 0.03000000 sec  
 TDO: 1

===== CHANNEL f1 =====  
 NUCL1: 13C  
 P1: 9.50 usec  
 PL1: 55.00000000 W  
 SFO1: 100.6260152 MHz

===== CHANNEL f2 =====  
 CPDPRG2: waltz16  
 NUCL2: 1H  
 PCPDR2: 90.00 usec  
 PLM2: 14.00000000 W  
 PLM12: 0.35297000 W  
 PLM13: 0.35428500 W  
 SFO2: 400.1464718 MHz

F2 - Processing parameters  
 SI: 32768  
 SF: 100.6450043 MHz  
 WDW: EM  
 SSB: 0  
 LB: 1.00 Hz  
 GB: 0  
 PC: 1.40

2-((E)-5-(2-chlorobenzylidene)-3-((E)-2-chlorobenzylideneamino)-4-oxo-2-thioxoimidazolidine-1-yl)acetic acid: 7b

<sup>1</sup>H NMR, DMSO, 400 MHz

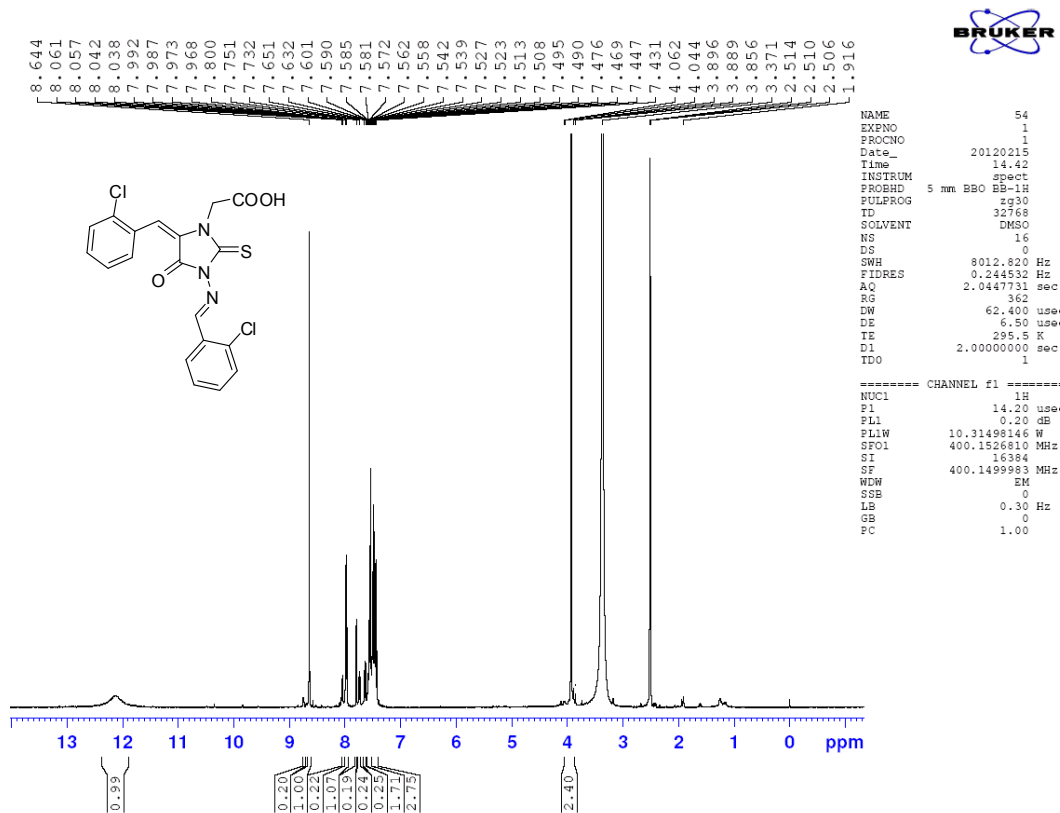

<sup>13</sup>C NMR, DMSO, 400 MHz

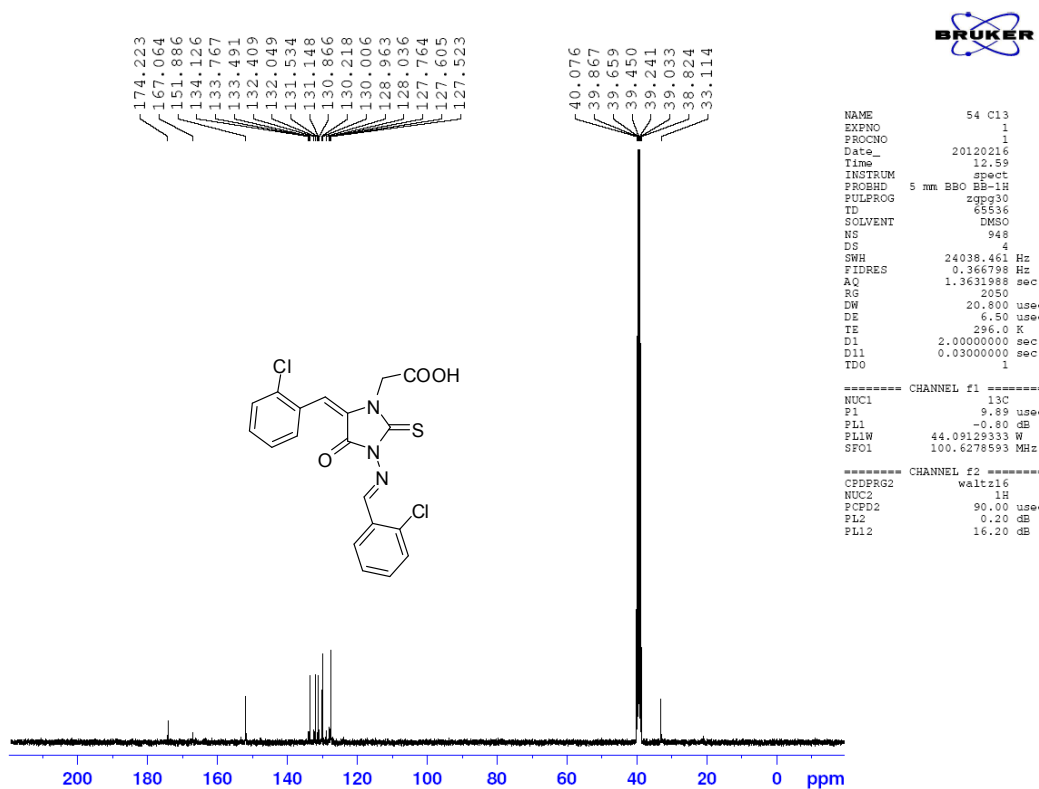



2-((E)-5-(3-hydroxybenzylidene)-3-((E)-3-hydroxybenzylideneamino)-4-oxo-2-thioximidazolidine-1-yl)acetic acid: 7c

<sup>1</sup>H NMR, DMSO, 400 MHz

CDD-30H

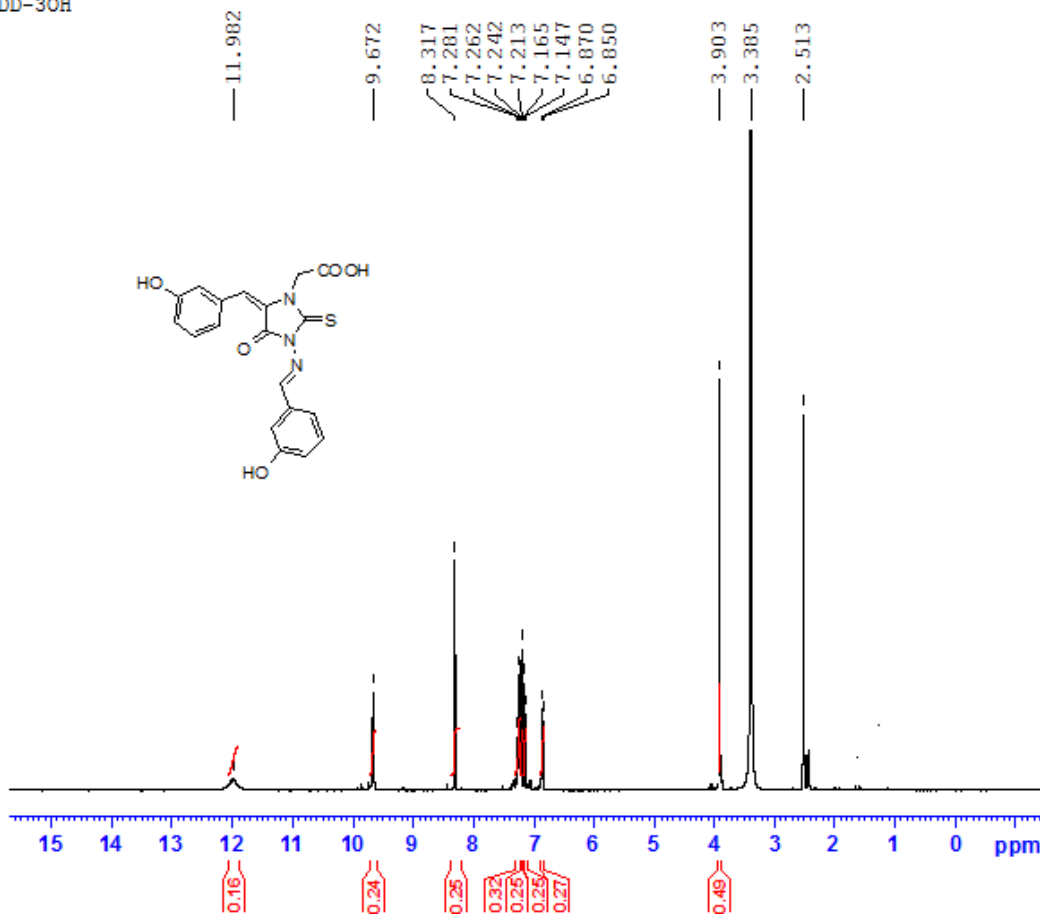

```

Current Data Parameters
NAME      SYN41113
EXPNO    79
PROCNO   1

F2 - Acquisition Parameters
Date_    20131130
Time     2.47
INSTRUM spect
PROBHD   5 mm PABBO BB/
PULPROG zg30
TD       65536
SOLVENT  DMSO
NS       16
DS       2
SWH      8223.685 Hz
FIDRES   0.125483 Hz
AQ       3.9845889 sec
RG       98.85
DW       60.800 usec
DE       6.50 usec
TE       296.2 K
D1       1.00000000 sec
TD0      1

===== CHANNEL f1 =====
NUC1     1H
P1       14.25 usec
PLW1     14.00000000 W
SFO1     400.2604718 MHz

F2 - Processing parameters
SI       65536
SF       400.2580000 MHz
WDW      EM
SSB      0
LB       0.30 Hz
GB       0
PC       1.00
    
```

<sup>13</sup>C NMR, DMSO, 400 MHz

CDD-30H

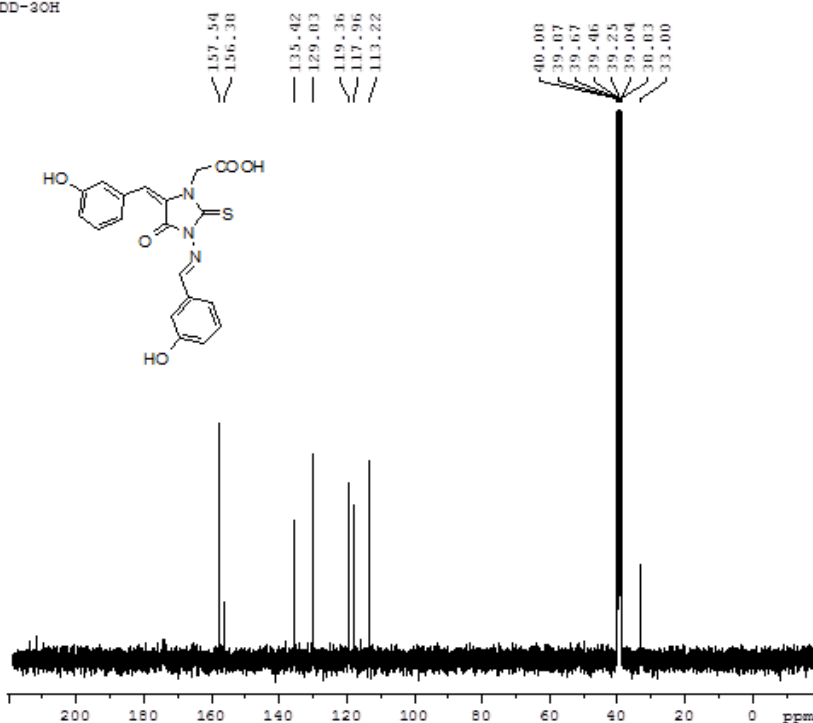

```

Current Data Parameters
NAME      SYN41113
EXPNO    4
PROCNO   1

F2 - Acquisition Parameters
Date_    20131130
Time     31.24
INSTRUM spect
PROBHD   5 mm PABBO BB/
PULPROG zgpg30
TD       65536
SOLVENT  DMSO
NS       512
DS       4
SWH      24038.460 Hz
FIDRES   0.368728 Hz
AQ       1.3821485 sec
RG       83.11
DW       20.500 usec
DE       8.50 usec
TE       296.4 K
D1       2.00000000 sec
D11      0.03000000 sec
TD0      1

===== CHANNEL C1 =====
NUC1     13C
P1       9.80 usec
PLW1     28.00000000 W
SFO1     100.6260152 MHz

===== CHANNEL C2 =====
CPDPRG2  waltz16
NUC2     13C
PCPD2   80.00 usec
PLW2     14.00000000 W
PLW12    0.35097000 W
PLW13    0.35425999 W
SFO2     400.2598010 MHz

F2 - Processing parameters
SI       32768
SF       100.6260043 MHz
WDW      EM
SSB      0
LB       1.00 Hz
GB       0
PC       1.40
    
```

2-((E)-5-(3-nitrobenzylidene)-3-((E)-3-nitrobenzylideneamino)-4-oxo-2-thioxoimidazolidine-1-yl)acetic acid: 7d

<sup>1</sup>H NMR, DMSO, 400 MHz

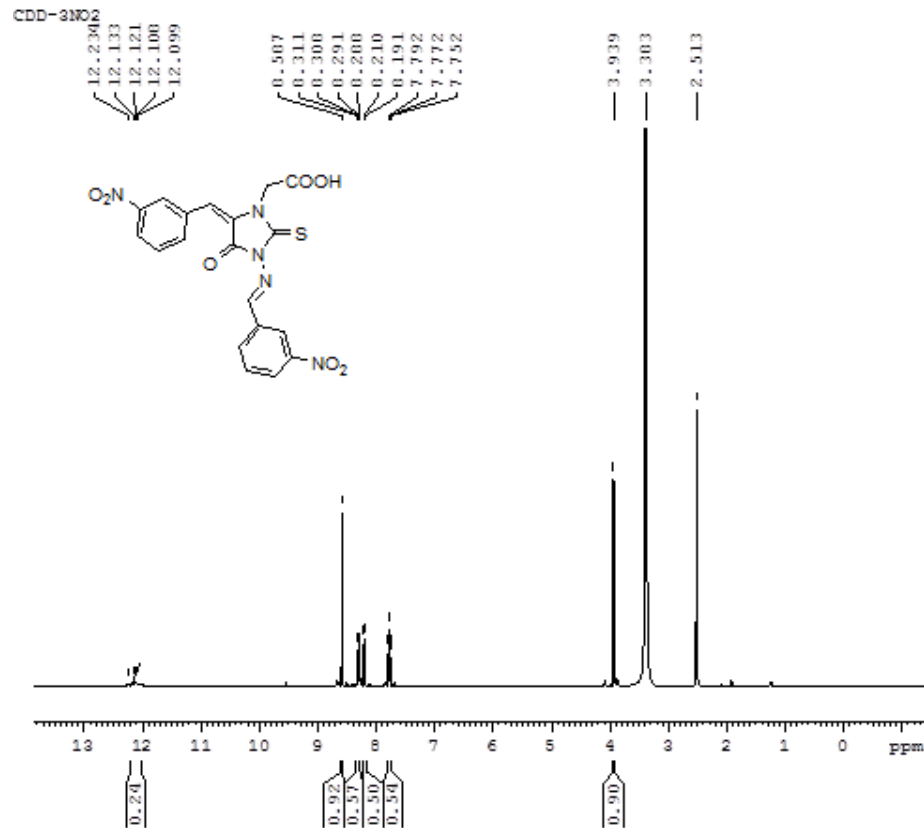

```

Current Data Parameters
NAME      5341213
EXPNO    1
PROCNO   11
PROCDS   1

F2 - Acquisition Parameters
Date_    20131201
Time     3.52
INSTRUM spect
PROBHD   5 mm PABBO BB/
PULPROG zgpg30
ID       85536
SOLVENT  DMSO
NS       16
DS       2
SWH      8223.855 Hz
FIDRES   0.128493 Hz
AQ       3.824559 sec
RG       127.78
DN       80.800 usec
DE       6.50 usec
TE       295.4 K
D1       1.0000000 sec
TD0      1

===== CHANNEL f1 =====
NUC1     1H
P1       14.25 usec
PL1      14.0000000 W
SFO1     400.2604715 MHz

F1 - Processing parameters
SI       85536
SF       400.2600000 MHz
WDW      EM
SSB      0
LB       0.30 Hz
GB       0
PC       1.00
    
```

<sup>13</sup>C NMR, DMSO, 400 MHz

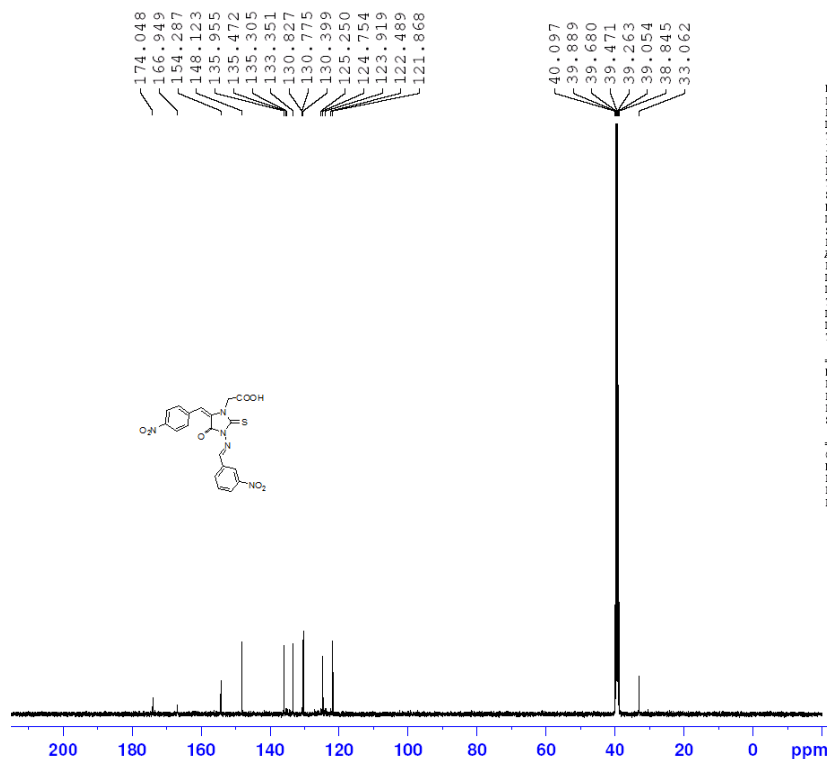

**BRUKER**

```

NAME      53 C13
EXPNO    1
PROCNO   1
Date_    20120216
Time     11.56
INSTRUM spect
PROBHD   5 mm BBO BB-1H
PULPROG zgpg30
ID       85536
SOLVENT  DMSO
NS       1024
DS       4
SWH      24038.461 Hz
FIDRES   0.366798 Hz
AQ       1.363198 sec
RG       2050
DN       20.800 usec
DE       6.50 usec
TE       295.9 K
D1       2.0000000 sec
D11      0.0300000 sec
TD0      1

===== CHANNEL f1 =====
NUC1     13C
P1       9.89 usec
PL1      -0.80 dB
PL1W     44.09129333 W
SFO1     100.6278593 MHz

===== CHANNEL f2 =====
CPDPRG2  waltz16
NUC2     1H
PCPD2    90.00 usec
PL2      0.20 dB
PL12     16.20 dB
    
```

2-((E) - 5-(3,4-dihydroxybenzylidene)-3-((E)-3,4-dihydroxybenzylideneamino)-4-oxo-2-thioximidazolidine-1-yl)acetic acid (7e)

<sup>1</sup>H NMR, DMSO, 400 MHz

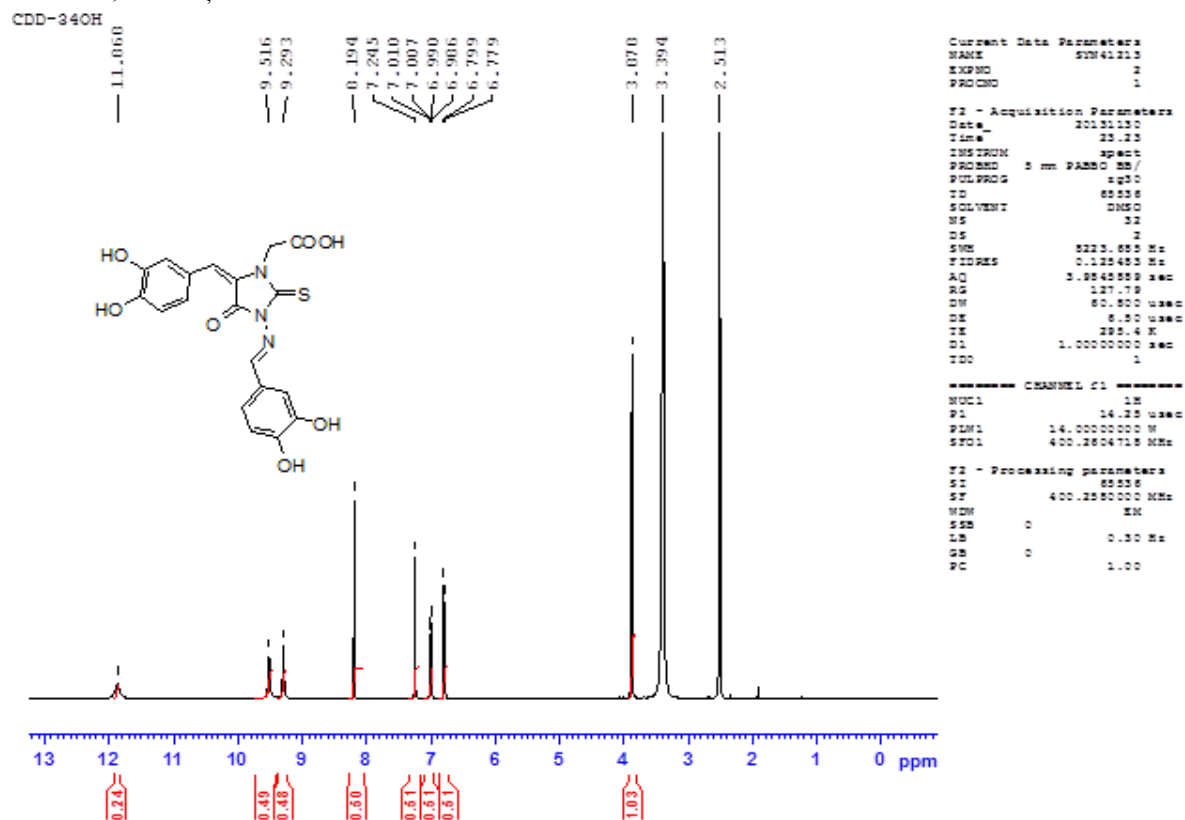

<sup>13</sup>C NMR, DMSO, 400 MHz

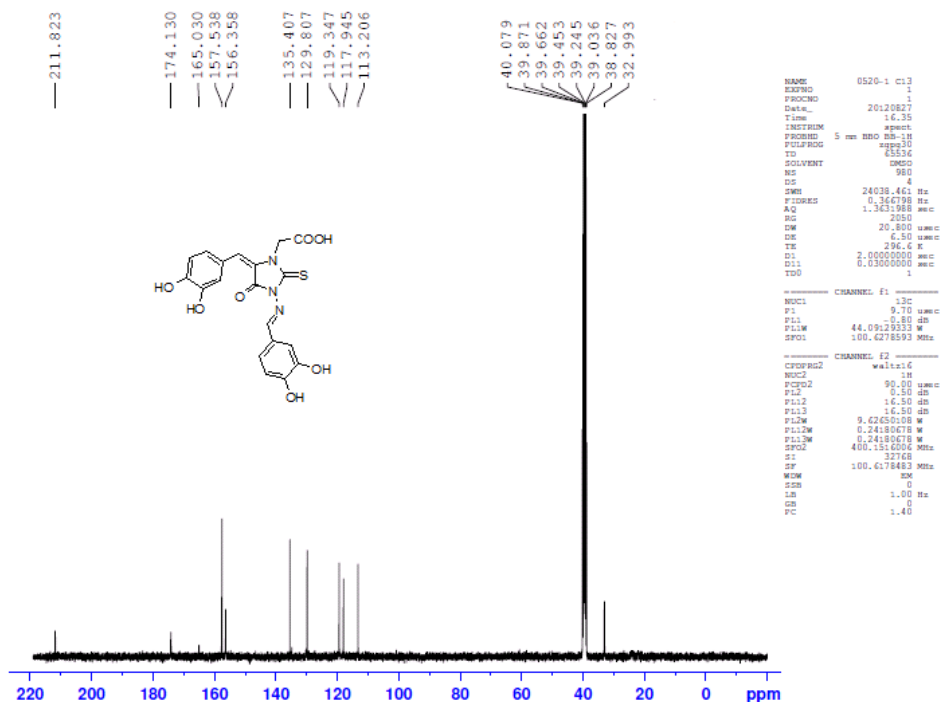

2-((E)-5-(4-methoxybenzylidene)-3-((E)-4-methoxybenzylideneamino)-4-oxo-2-thioximidazolidine-1-yl)acetic acid :7f  
<sup>1</sup>H NMR, DMSO, 400 MHz

CDD-460

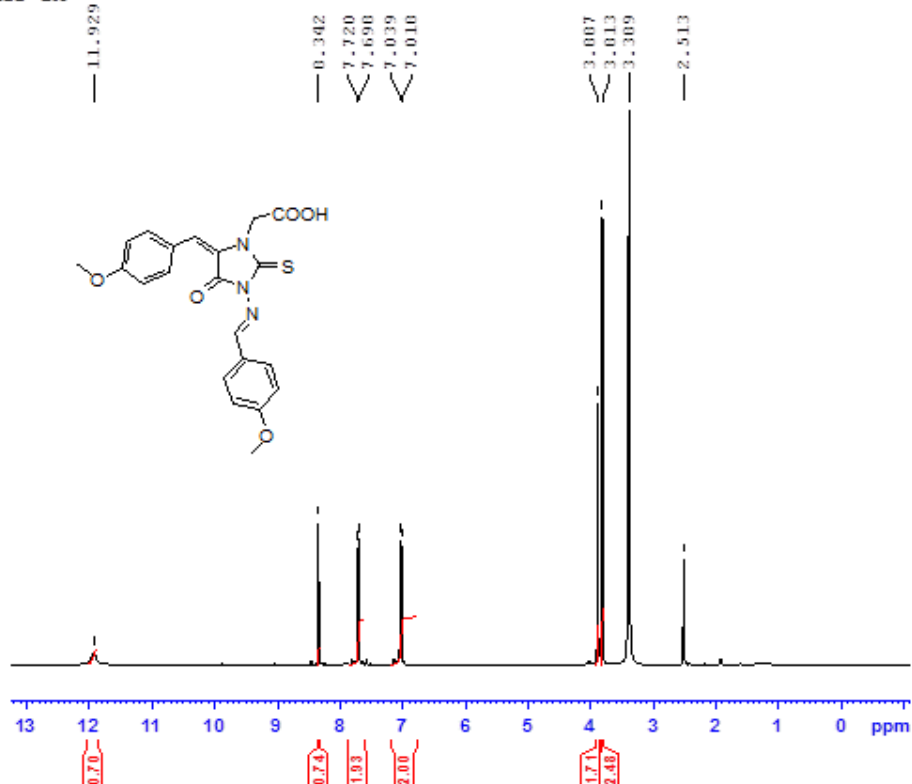

Current Data Parameters  
 NAME SUN41113  
 EXPNO 75  
 PROCNO 1

F2 - Acquisition Parameters  
 Date\_ 20131130  
 Time 2.44  
 INSTRUM spect  
 PROBHD 5 mm PABBO BB/  
 PULPROG zgpg30  
 TD 65536  
 SOLVENT DMSO  
 NS 16  
 DS 2  
 SWS 5223.655 Hz  
 FIDRES 0.125453 Hz  
 AQ 3.284559 sec  
 RG 59.89  
 DM 60.800 usec  
 DE 8.50 usec  
 TE 298.2 K  
 D1 1.00000000 sec  
 TDD 1

===== CHANNEL f1 =====  
 NUCL1 1H  
 P1 14.25 usec  
 PL10 14.00000000 W  
 SF10 400.2604715 MHz

F2 - Processing parameters  
 SI 65536  
 SF 400.2590000 MHz  
 NDM 5M  
 SSB 0  
 LB 0.30 Hz  
 GB 0  
 PC 1.00

<sup>13</sup>C NMR, DMSO, 400 MHz

CDD-460

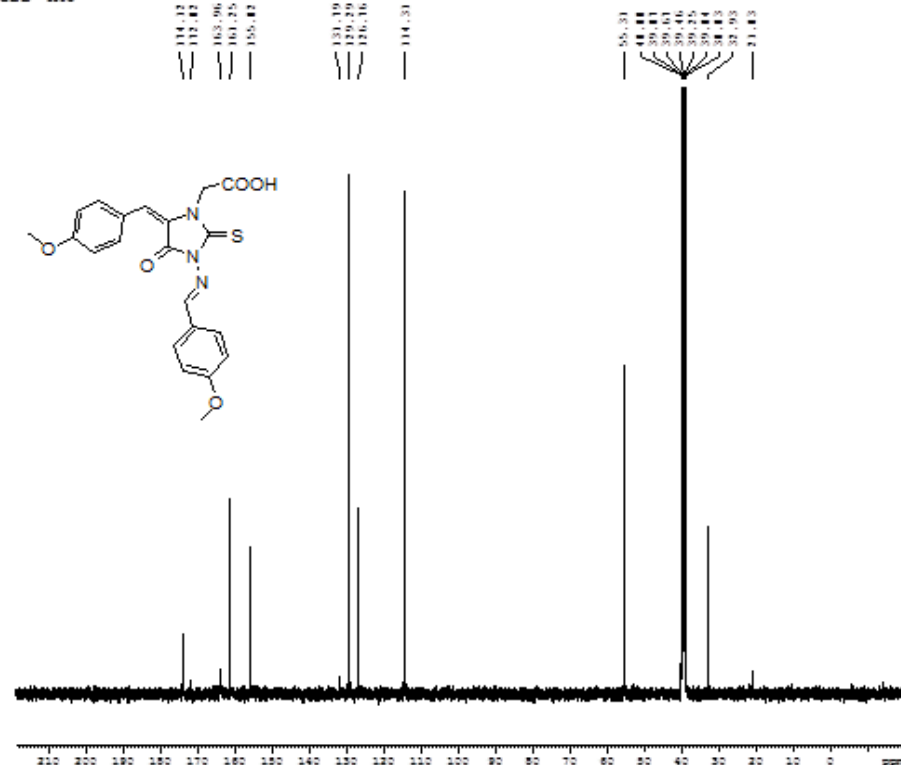

Current Data Parameters  
 NAME SUN41113  
 EXPNO 4  
 PROCNO 1

F2 - Acquisition Parameters  
 Date\_ 20131201  
 Time 0.27  
 INSTRUM spect  
 PROBHD 5 mm PABBO BB/  
 PULPROG zgpg30  
 TD 65536  
 SOLVENT DMSO  
 NS 4  
 DS 4  
 SWS 24038.481 Hz  
 FIDRES 0.368798 Hz  
 AQ 1.3831488 sec  
 RG 158.91  
 DM 20.800 usec  
 DE 8.50 usec  
 TE 298.2 K  
 D1 2.00000000 sec  
 D11 0.03000000 sec  
 TDD 1

===== CHANNEL f1 =====  
 NUCL1 13C  
 P1 9.50 usec  
 PL10 55.00000000 W  
 SF10 100.6260152 MHz

===== CHANNEL f2 =====  
 CPDPRG2 waltz16  
 NUCL2 1H  
 PCPD2 90.00 usec  
 PL102 14.00000000 W  
 PL101 0.38097000 W  
 PL103 0.25428998 W  
 SF102 400.2596010 MHz

F2 - Processing parameters  
 SI 32768  
 SF 100.6260043 MHz  
 NDM 5M  
 SSB 0  
 LB 1.00 Hz  
 GB 0  
 PC 1.40

2-((E)-5-(4-ethylbenzylidene)-3-((E)-4-ethylbenzylideneamino)-4-oxo-2-thioxoimidazolidine-1-yl)acetic acid: 7g

<sup>1</sup>H NMR, DMSO, 400 MHz

CDD-4E

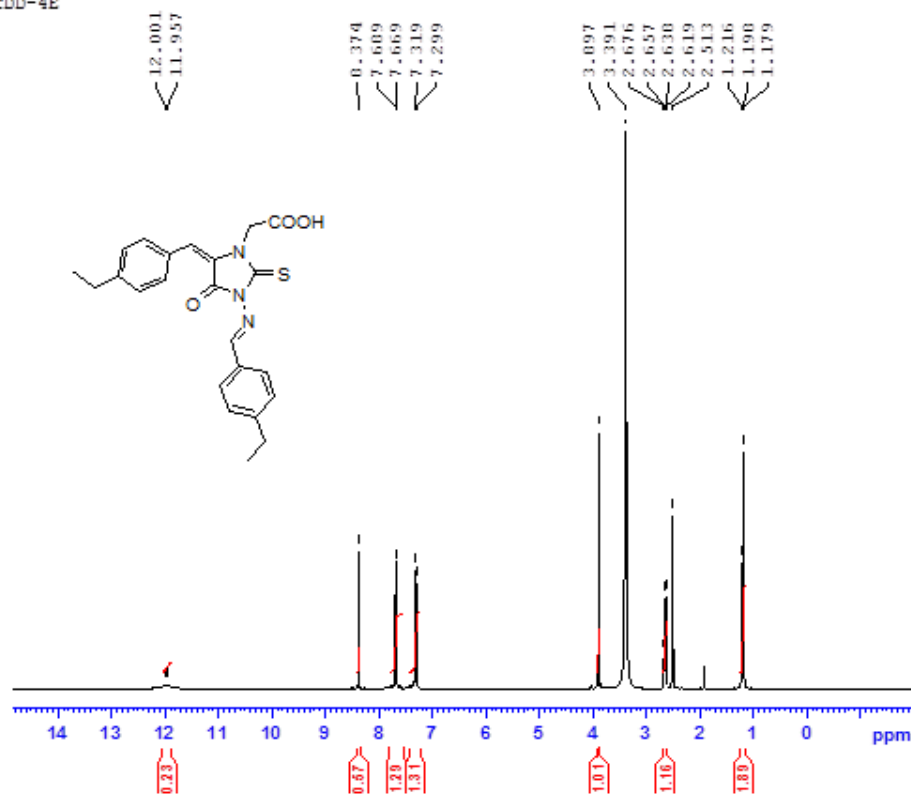

```

Current Data Parameters
NAME      SYN41213
EXPNO    1
PROCNO   1

F2 - Acquisition Parameters
Date_    20131130
Time     23.19
INSTRUM  spect
PROBHD   5 mm PABBO BB/
PULPROG  zgpg30
TD       65536
SOLVENT  DMSO
NS       32
DS       2
SWH      5223.655 Hz
FIDRES   0.128453 Hz
AQ       3.9545559 sec
RG       65.51
DW       60.800 usec
DE       6.50 usec
TE       295.3 K
D1       1.00000000 sec
TD0      1

===== CHANNEL f1 =====
NUC1     1H
P1       14.25 usec
PLW1     14.00000000 W
SFO1     400.2604718 MHz

F2 - Processing parameters
SI       65536
SF       400.260000 MHz
WDW      EM
SSB      0
LB       0.30 Hz
GB       0
PC       1.00
    
```

<sup>13</sup>C NMR, DMSO, 400 MHz

CDD-4E

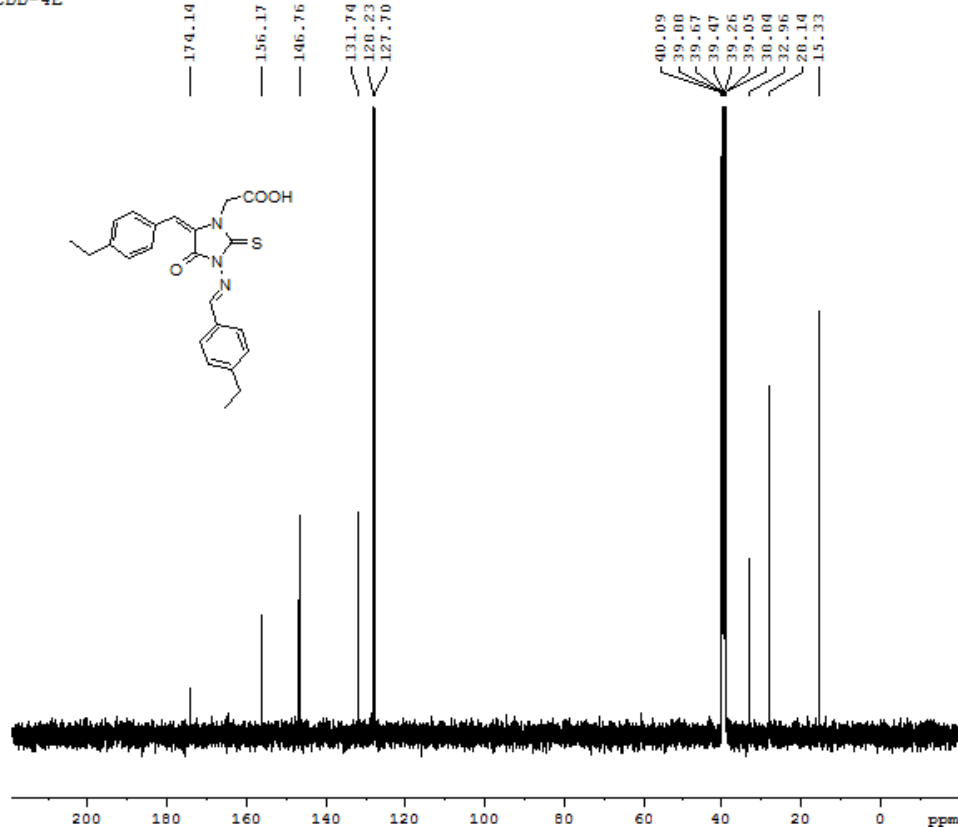

```

Current Data Parameters
NAME      SYN41213
EXPNO    5
PROCNO   1

F2 - Acquisition Parameters
Date_    20131201
Time     1.34
INSTRUM  spect
PROBHD   5 mm PABBO BB/
PULPROG  zgpg30
TD       65536
SOLVENT  DMSO
NS       512
DS       4
SWH      24038.461 Hz
FIDRES   0.366798 Hz
AQ       1.3631488 sec
RG       156.91
DW       20.800 usec
DE       6.50 usec
TE       296.6 K
D1       2.00000000 sec
D11      0.03000000 sec
TD0      1

===== CHANNEL f1 =====
NUC1     13C
P1       9.80 usec
PLW1     58.00000000 W
SFO1     100.6250182 MHz

===== CHANNEL f2 =====
CPDPRG2  waltz16
NUC2     1H
PCPD2    90.00 usec
PLW2     14.00000000 W
PLW12    0.35097000 W
PLW13    0.28428999 W
SFO2     400.2596010 MHz

F2 - Processing parameters
SI       65536
SF       100.6250043 MHz
WDW      EM
SSB      0
LB       1.00 Hz
GB       0
PC       1.40
    
```

2-((E) - 5-(4-fluorobenzylidene)-3-((E)-4-fluorobenzylideneamino)-4-oxo-2-thioxoimidazolidine-1-yl)acetic acid: 7h

<sup>1</sup>H NMR, DMSO, 400 MHz

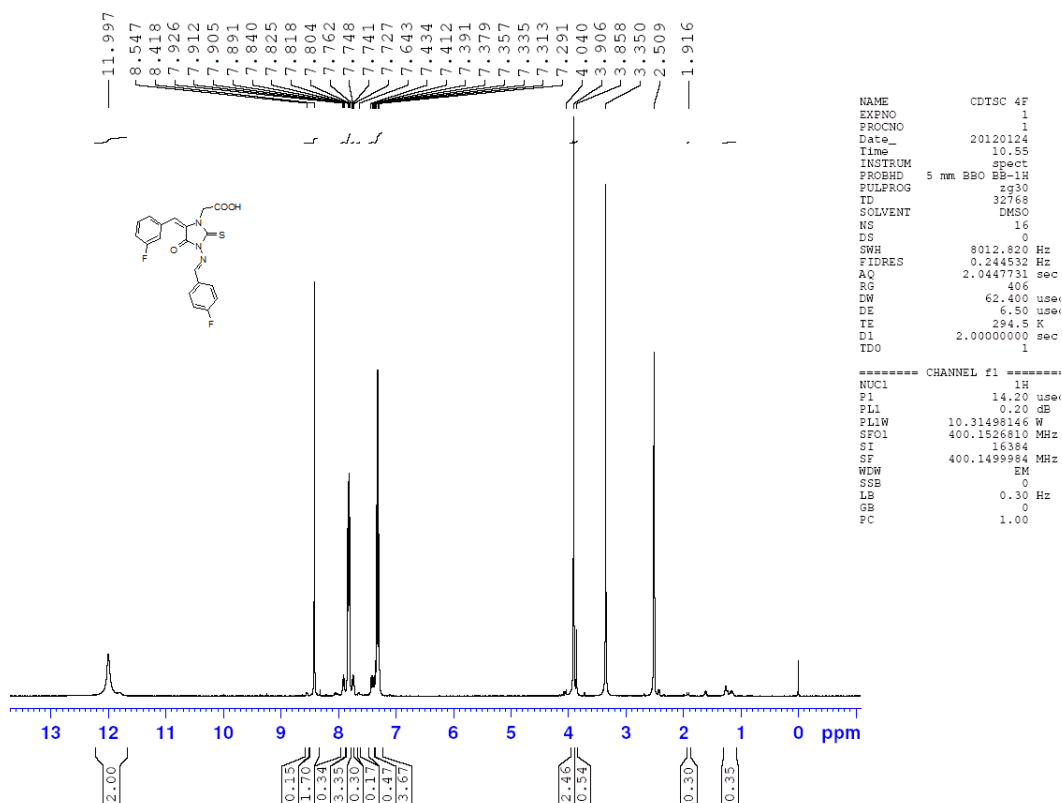

<sup>13</sup>C NMR, DMSO, 400 MHz

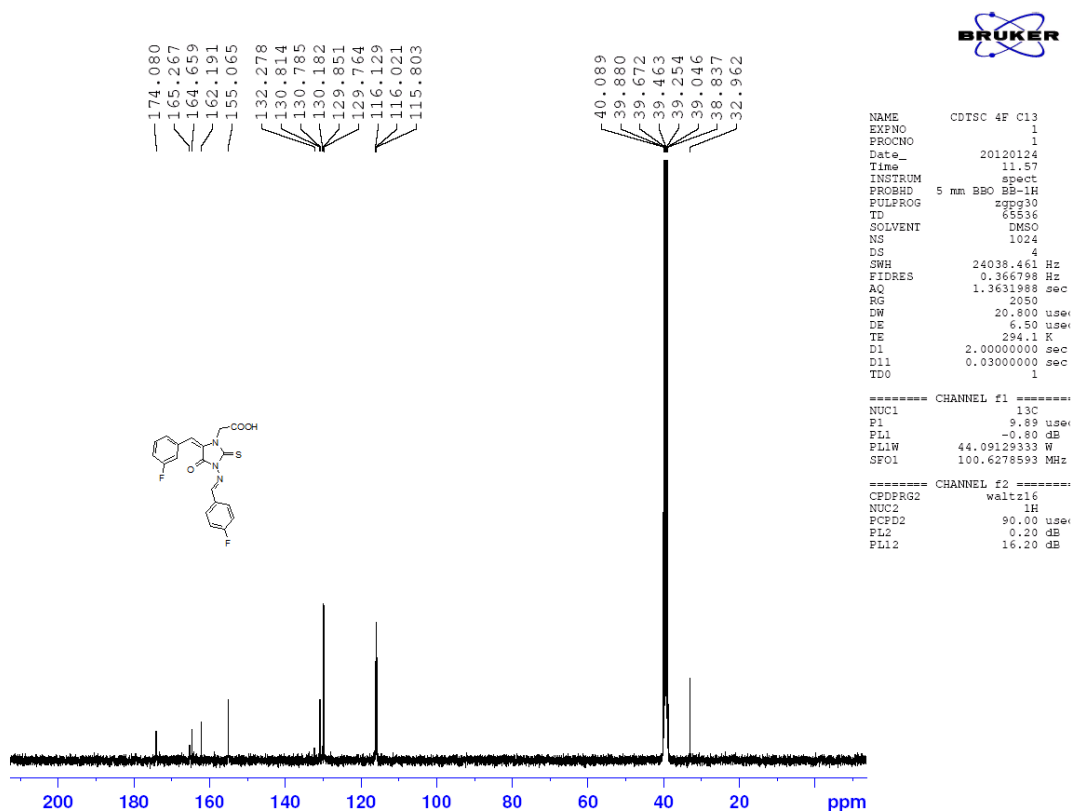

2-((E)-5-(4-ethoxybenzylidene)-3-((E)-4-ethoxybenzylideneamino)-4-oxo-2-thioxoimidazolidine-1-yl)acetic acid: 7i

<sup>1</sup>H NMR, DMSO, 400 MHz

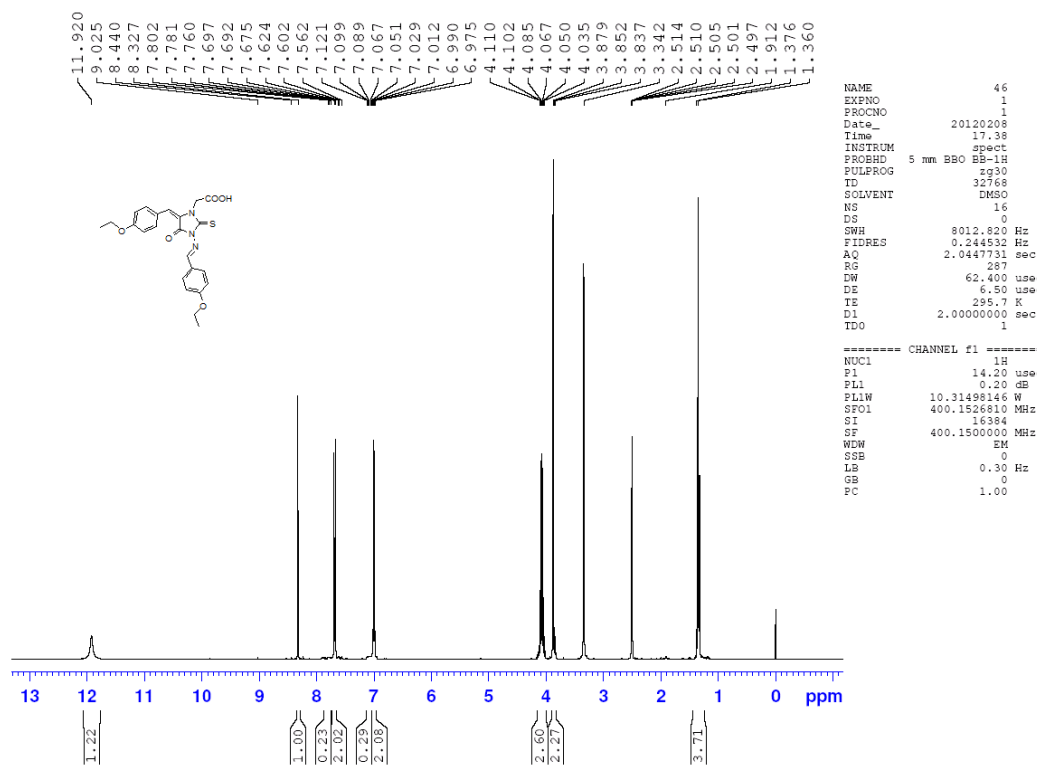

<sup>13</sup>C NMR, DMSO, 400 MHz

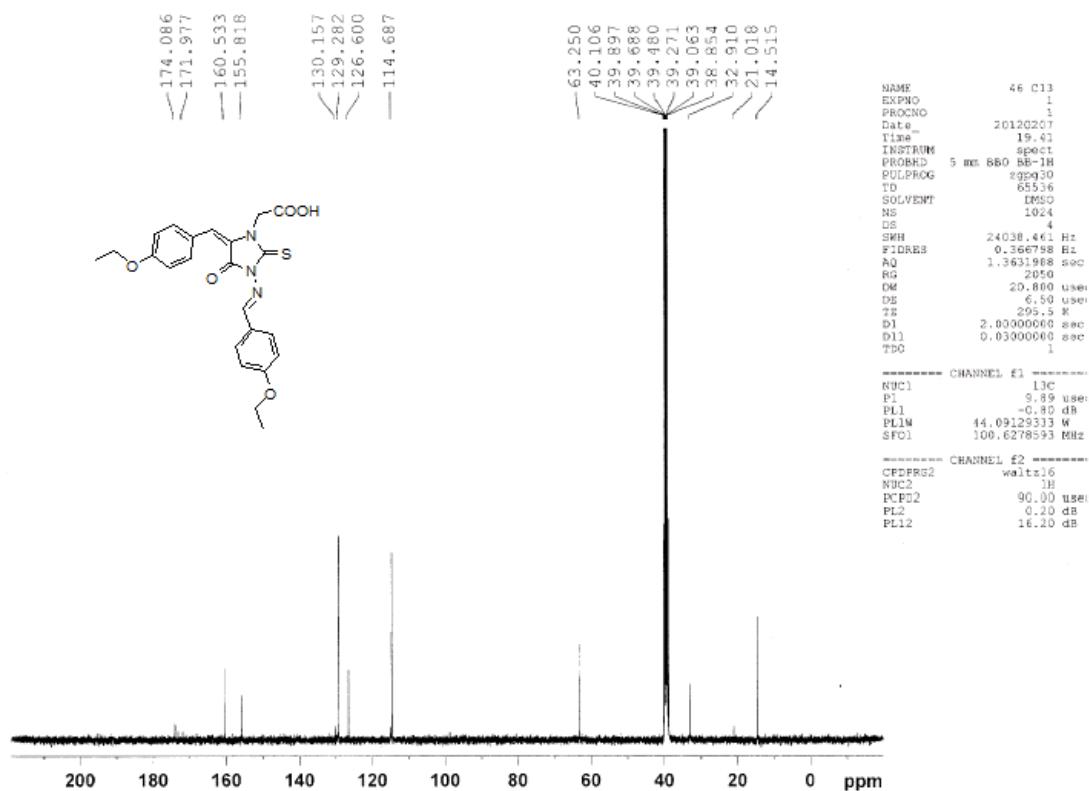

2-((E) - 5-(4-methylbenzylidene)-3-((E)-4-methylbenzylideneamino)-4-oxo-2-thioximidazolidine-1-yl)acetic acid: 7j

<sup>1</sup>H NMR, DMSO, 400 MHz

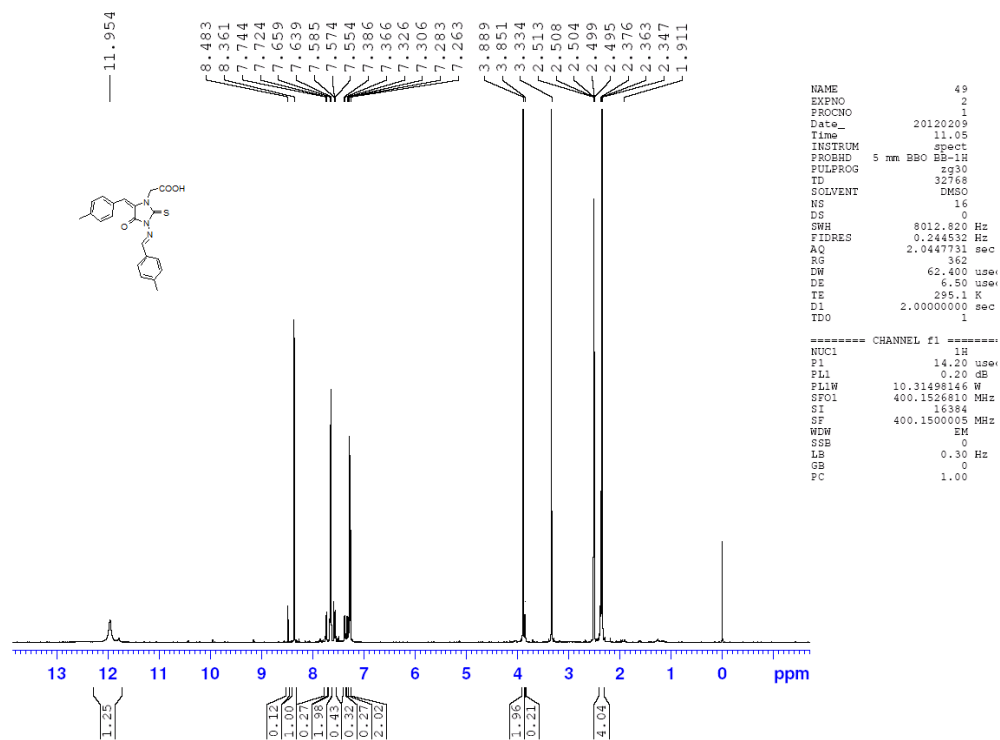

<sup>13</sup>C NMR, DMSO, 400 MHz

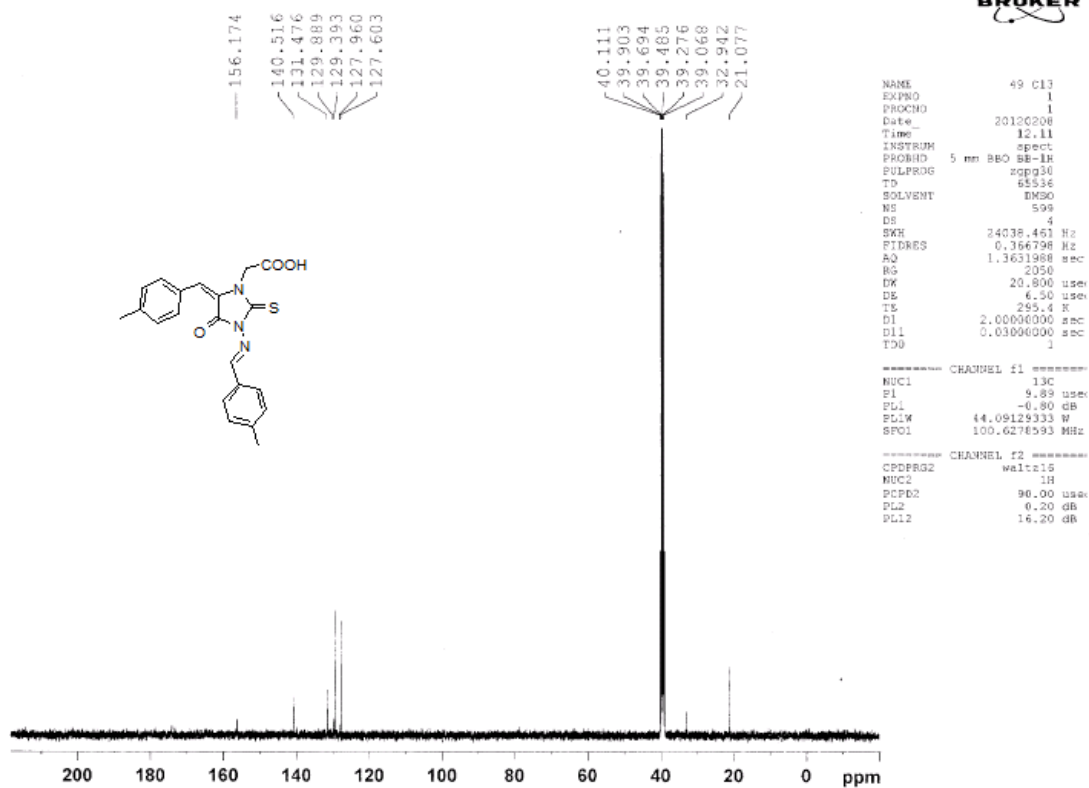





2-((E)-5-(4-hydroxybenzylidene)-3-((E)-4-hydroxybenzylideneamino)-4-oxo-2-thioximidazolidine-1-yl)acetic acid: 7i

<sup>1</sup>H NMR, DMSO, 400 MHz

CDD-40H

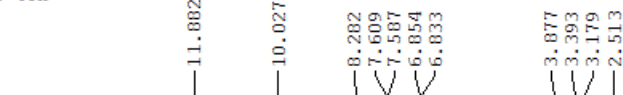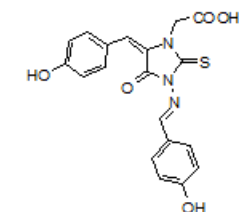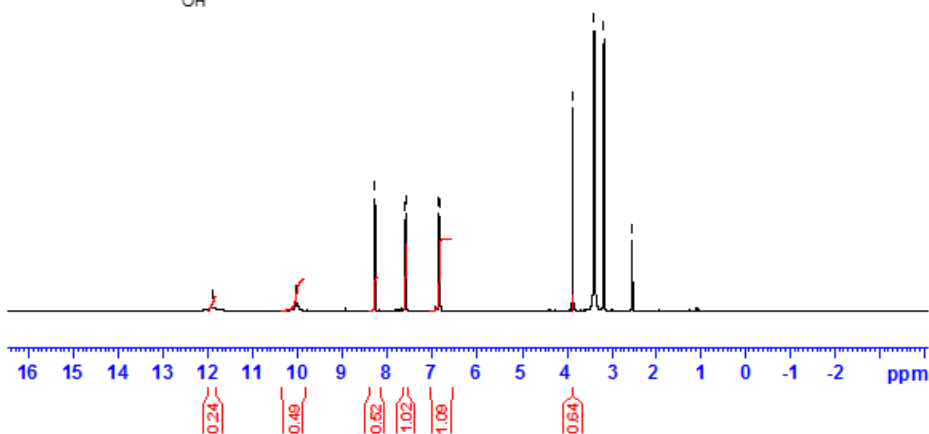

```

Current Data Parameters
NAME      MAP41113
EXPNO    45
PROCNO   1

F2 - Acquisition Parameters
Date_    20131126
Time     11.23
INSTRUM spect
PROBHD   5 mm PARBO BB/
PULPROG zg30
TD       65536
SOLVENT  DMSO
NS       16
DS       2
SWH      8223.685 Hz
FIDRES   0.125483 Hz
AQ       3.9845889 sec
RG       98.85
DW       60.800 usec
DE       6.50 usec
TE       295.1 K
D1       1.00000000 sec
TD0      1

===== CHANNEL f1 =====
NUC1     1H
P1       14.25 usec
PL1      14.00000000 W
SFO1     400.2604718 MHz

F2 - Processing parameters
SI       65536
SF       400.2580000 MHz
WDW      EM
SSB      0
LB       0.30 Hz
GB       0
PC       1.00
    
```

<sup>13</sup>C NMR, DMSO, 400 MHz

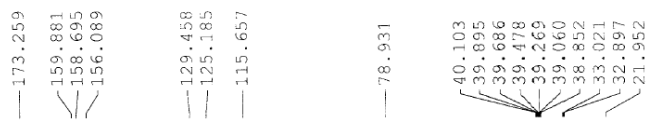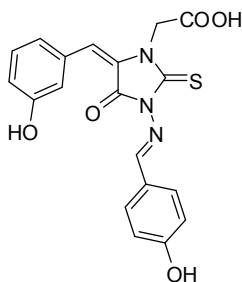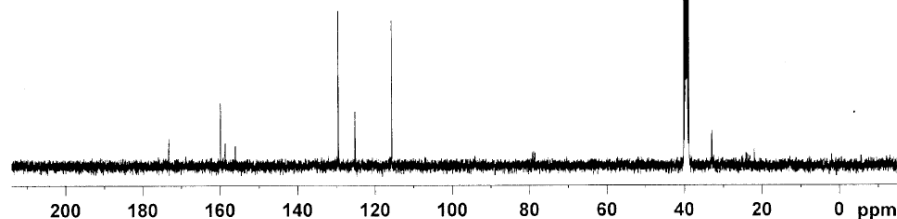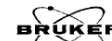

```

NAME      48 C13
EXPNO    1
PROCNO   1
Date_    20120208
Time     11.34
INSTRUM spect
PROBHD   5 mm BBO BB-1H
PULPROG zgpg30
TD       65536
SOLVENT  DMSO
NS       823
DS       4
SWH      24038.461 Hz
FIDRES   0.366798 Hz
AQ       1.3631988 sec
RG       2050
DW       20.800 usec
DE       6.50 usec
TE       295.4 K
D1       2.00000000 sec
D11      0.03000000 sec
TD0      1

===== CHANNEL f1 =====
NUC1     13C
P1       9.89 usec
PL1      -0.50 dB
PL1W     44.09129333 W
SFO1     100.6278593 MHz

===== CHANNEL f2 =====
CPDPRG2 waltz16
NUC2     1H
PCPD2    90.00 usec
PL2      0.20 dB
PL12     16.20 dB
    
```

2-((E)-5-(4-benzyloxybenzylidene)-3-((E)-4-benzyloxybenzylideneamino)-4-oxo-2-thioxoimidazolidine-1-yl)acetic acid: 7m

<sup>1</sup>H NMR, DMSO, 400 MHz

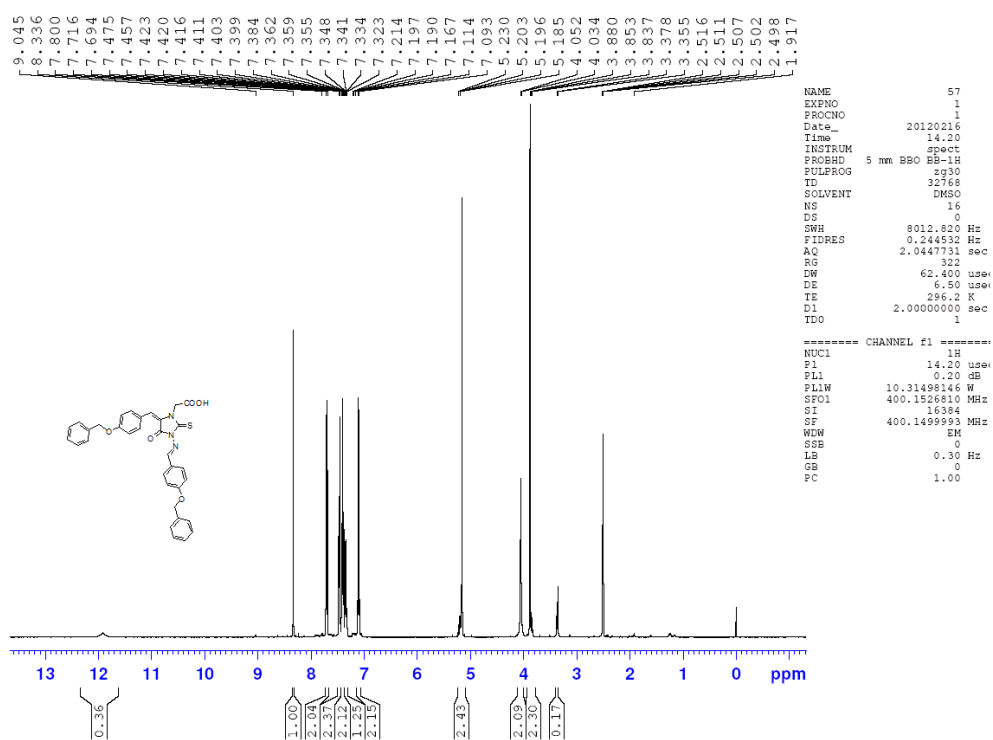

<sup>13</sup>C NMR, DMSO, 400 MHz

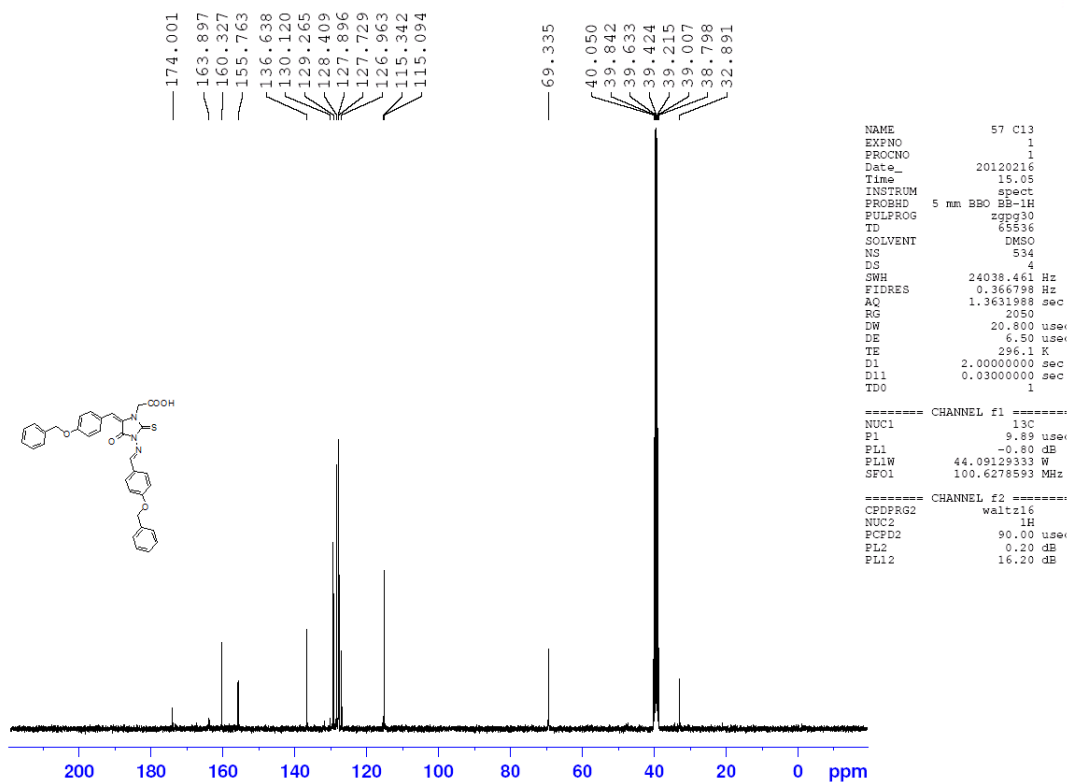

2-((E)-4-oxo-5-(3-styrylbenzylidene)-3-((E)-styrylbenzylideneamino)-2-thioxoimidazolidine-1-yl)acetic acid : 7n  
(Table-2,Entry15)

<sup>1</sup>H NMR, DMSO, 400 MHz

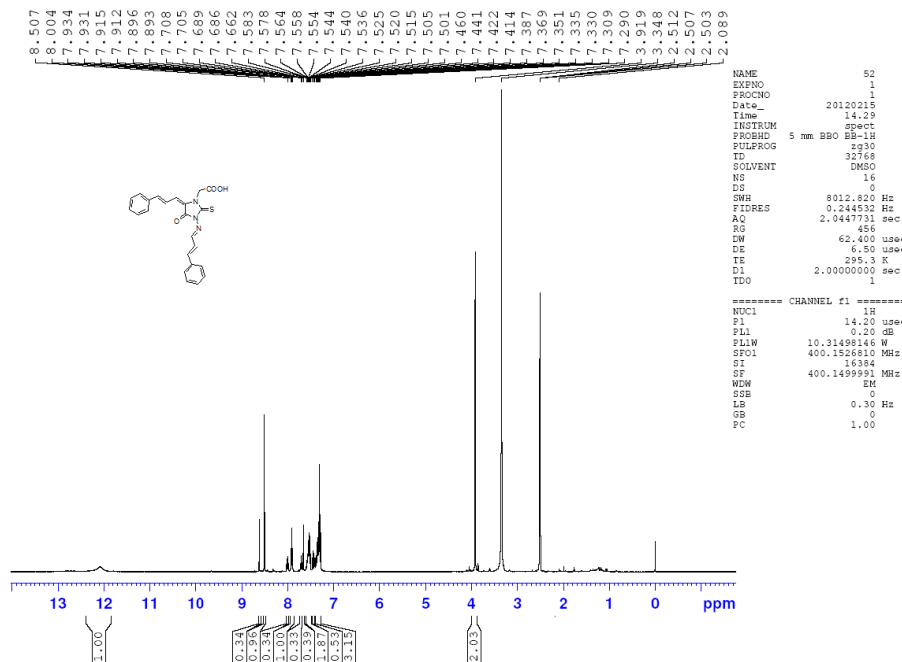

<sup>13</sup>C NMR, DMSO, 400 MHz

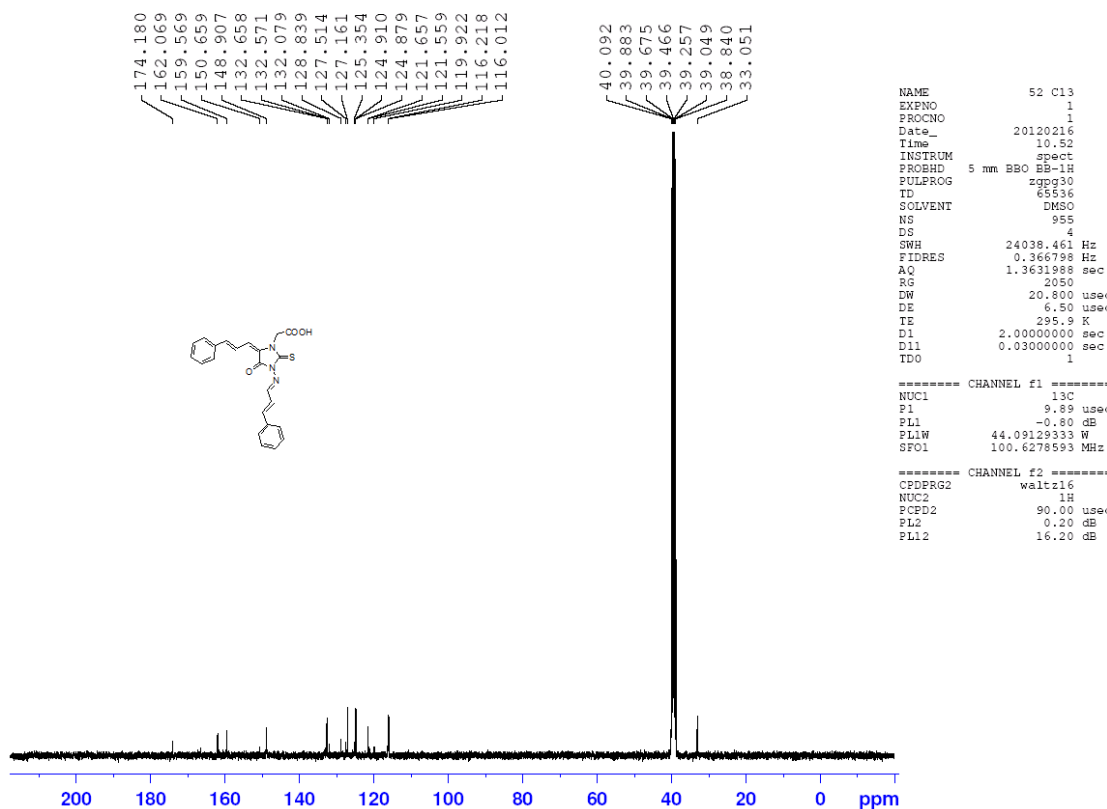

Supplement: c3ra47680d.pdf [file c3ra47680d.pdf]
